# Supplementary material
Source: publisher figshare collection journal article supplement (https://acs.figshare.com/ndownloader/files/4396753)
Supplement: Supplementary file 1 [file 4396753]

#========================================================================================
 
data_[Tpm*Cu(dmise)][BF4]

#========================================================================================
_publ_section_references         
;
    ENTER OTHER REFERENCES

    Jacobson, R. (1998). <i>REQAB</i>. Version 1.1. Molecular Structure
Corporation, The Woodlands, Texas, USA.

Molecular Structure Corporation & Rigaku (2006). <i>CrystalClear</i> MSC, The
Woodlands, Texas, USA, and Rigaku Corporation, Tokyo, Japan.

Sheldrick, G. M. (2008). <i>SHELXTL</i>.Version 6.10 Acta Cryst. A64, 112-122.
;

_publ_section_exptl_refinement   
;
    ENTER SPECIAL DETAILS OF THE REFINEMENT
;

_audit_creation_method           SHELXL-97
_chemical_name_systematic        ?
_chemical_name_common            ?
_chemical_formula_moiety         'C21 H30 Cu N8 Se, B F4'
_chemical_formula_sum            'C21 H30 B Cu F4 N8 Se'
_chemical_properties_physical    'air-sensitive, moisture-sensitive'
_exptl_crystal_recrystallization_method 
'slow diffusion of ether into acetonitrile solution'
_chemical_melting_point          336-342

_exptl_crystal_description       Prism
_exptl_crystal_colour            colorless

_diffrn_ambient_temperature      168.15
_chemical_formula_weight         623.84

loop_
_atom_type_symbol
_atom_type_description
_atom_type_scat_dispersion_real
_atom_type_scat_dispersion_imag
_atom_type_scat_source
C C 0.0033 0.0016 'International Tables Vol C Tables 4.2.6.8 and 6.1.1.4'
H H 0.0000 0.0000 'International Tables Vol C Tables 4.2.6.8 and 6.1.1.4'
B B 0.0013 0.0007 'International Tables Vol C Tables 4.2.6.8 and 6.1.1.4'
N N 0.0061 0.0033 'International Tables Vol C Tables 4.2.6.8 and 6.1.1.4'
F F 0.0171 0.0103 'International Tables Vol C Tables 4.2.6.8 and 6.1.1.4'
Cu Cu 0.3201 1.2651 'International Tables Vol C Tables 4.2.6.8 and 6.1.1.4'
Se Se -0.0929 2.2259 'International Tables Vol C Tables 4.2.6.8 and 6.1.1.4'

_symmetry_cell_setting           monoclinic
_symmetry_space_group_name_H-M   'P 21/c'
_symmetry_int_tables_number      14
_chemical_absolute_configuration ?
_symmetry_space_group_name_Hall  '-P 2ybc'

loop_
_symmetry_equiv_pos_as_xyz
'x, y, z'
'-x, y+1/2, -z+1/2'
'-x, -y, -z'
'x, -y-1/2, z-1/2'

_cell_length_a                   12.199(2)
_cell_length_b                   16.322(3)
_cell_length_c                   13.043(3)
_cell_angle_alpha                90.00
_cell_angle_beta                 93.54(3)
_cell_angle_gamma                90.00
_cell_volume                     2592.2(9)
_cell_formula_units_Z            4
_cell_measurement_temperature    168.15
_cell_measurement_reflns_used    5472
_cell_measurement_theta_min      2.50
_cell_measurement_theta_max      26.71

_exptl_crystal_size_max          0.48
_exptl_crystal_size_mid          0.32
_exptl_crystal_size_min          0.28
_exptl_crystal_density_meas      ?
_exptl_crystal_density_diffrn    1.598
_exptl_crystal_density_method    'not measured'
_exptl_crystal_F_000             1264
_exptl_absorpt_coefficient_mu    2.302
_exptl_absorpt_correction_type   multi-scan
_exptl_absorpt_correction_T_min  0.4045
_exptl_absorpt_correction_T_max  0.5650
_exptl_absorpt_process_details   'REQAB, CrystalClear'

_exptl_special_details           
; 
 ? 
;
_diffrn_radiation_probe          x-ray
_diffrn_radiation_type           MoK\a

_diffrn_radiation_wavelength     0.71073
_diffrn_source_type              'Rigaku Mercury CCD '
_diffrn_radiation_monochromator  graphite
_diffrn_measurement_device_type  'Rigaku AFC8S'
_diffrn_measurement_method       dtprofit.ref
_diffrn_detector_area_resol_mean 14.6306
_diffrn_standards_number         0
_diffrn_standards_interval_count 0
_diffrn_standards_interval_time  0
_diffrn_standards_decay_%        0
_diffrn_reflns_number            21217
_diffrn_reflns_av_R_equivalents  0.0354
_diffrn_reflns_av_sigmaI/netI    0.0318
_diffrn_reflns_limit_h_min       -15
_diffrn_reflns_limit_h_max       12
_diffrn_reflns_limit_k_min       -20
_diffrn_reflns_limit_k_max       20
_diffrn_reflns_limit_l_min       -16
_diffrn_reflns_limit_l_max       15
_diffrn_reflns_theta_min         2.50
_diffrn_reflns_theta_max         26.71
_reflns_number_total             5472
_reflns_number_gt                4702
_reflns_threshold_expression     >2sigma(I)

_computing_data_collection       'CrystalClear (Rigaku/MSC,2006)'
_computing_cell_refinement       'CrystalClear (Rigaku/MSC,2006)'
_computing_data_reduction        'CrystalClear (Rigaku/MSC,2006)'
_computing_structure_solution    'SHELXTL 6.10 (Sheldrick,2008)'
_computing_structure_refinement  'SHELXTL 6.10 (Sheldrick,2008)'
_computing_molecular_graphics    'SHELXTL 6.10 (Sheldrick,2008)'
_computing_publication_material  'SHELXTL 6.10 (Sheldrick,2008)'

_refine_special_details          
; 
 Refinement of F^2^ against ALL reflections.  The weighted R-factor wR and 
 goodness of fit S are based on F^2^, conventional R-factors R are based 
 on F, with F set to zero for negative F^2^. The threshold expression of 
 F^2^ > 2sigma(F^2^) is used only for calculating R-factors(gt) etc. and is 
 not relevant to the choice of reflections for refinement.  R-factors based 
 on F^2^ are statistically about twice as large as those based on F, and R- 
 factors based on ALL data will be even larger. 
;

_refine_ls_structure_factor_coef Fsqd
_refine_ls_matrix_type           full
_refine_ls_weighting_scheme      calc
_refine_ls_weighting_details     
'calc w=1/[\s^2^(Fo^2^)+(0.0578P)^2^+1.9397P] where P=(Fo^2^+2Fc^2^)/3'
_atom_sites_solution_primary     direct
_atom_sites_solution_secondary   difmap
_atom_sites_solution_hydrogens   geom
_refine_ls_hydrogen_treatment    constr
_refine_ls_extinction_method     none
_refine_ls_extinction_coef       ?
_refine_ls_number_reflns         5472
_refine_ls_number_parameters     333
_refine_ls_number_restraints     0
_refine_ls_R_factor_all          0.0507
_refine_ls_R_factor_gt           0.0435
_refine_ls_wR_factor_ref         0.1157
_refine_ls_wR_factor_gt          0.1096
_refine_ls_goodness_of_fit_ref   1.110
_refine_ls_restrained_S_all      1.110
_refine_ls_shift/su_max          0.001
_refine_ls_shift/su_mean         0.000

loop_
_atom_site_label
_atom_site_type_symbol
_atom_site_fract_x
_atom_site_fract_y
_atom_site_fract_z
_atom_site_U_iso_or_equiv
_atom_site_adp_type
_atom_site_occupancy
_atom_site_symmetry_multiplicity
_atom_site_calc_flag
_atom_site_refinement_flags
_atom_site_disorder_assembly
_atom_site_disorder_group
Cu Cu 0.20389(3) 0.33859(2) 0.89119(3) 0.03128(12) Uani 1 1 d . . .
Se Se 0.13301(3) 0.208530(18) 0.90026(2) 0.03445(11) Uani 1 1 d . . .
N1 N 0.2622(2) 0.06495(17) 0.9396(2) 0.0394(6) Uani 1 1 d . . .
N2 N 0.3012(2) 0.15582(16) 1.05641(19) 0.0347(6) Uani 1 1 d . . .
N3 N 0.1801(2) 0.43458(14) 0.99767(17) 0.0283(5) Uani 1 1 d . . .
N7 N 0.2192(2) 0.50983(14) 0.96939(17) 0.0271(5) Uani 1 1 d . . .
N5 N 0.3618(2) 0.38163(15) 0.88047(18) 0.0299(5) Uani 1 1 d . . .
N6 N 0.3723(2) 0.46546(15) 0.87585(18) 0.0279(5) Uani 1 1 d . . .
N4 N 0.1510(2) 0.42310(14) 0.77843(17) 0.0276(5) Uani 1 1 d . . .
N8 N 0.2007(2) 0.49850(14) 0.78552(17) 0.0266(5) Uani 1 1 d . . .
C1 C 0.2382(3) 0.14186(19) 0.9687(2) 0.0329(6) Uani 1 1 d . . .
C2 C 0.3047(3) 0.2311(2) 1.1164(3) 0.0444(8) Uani 1 1 d . . .
H2A H 0.2755 0.2754 1.0747 0.067 Uiso 1 1 calc R . .
H2B H 0.3794 0.2431 1.1391 0.067 Uiso 1 1 calc R . .
H2C H 0.2617 0.2244 1.1750 0.067 Uiso 1 1 calc R . .
C3 C 0.3635(3) 0.0878(2) 1.0811(3) 0.0446(8) Uani 1 1 d . . .
H3A H 0.4133 0.0821 1.1376 0.054 Uiso 1 1 calc R . .
C4 C 0.3393(3) 0.0312(2) 1.0089(3) 0.0482(9) Uani 1 1 d . . .
H4A H 0.3690 -0.0212 1.0061 0.058 Uiso 1 1 calc R . .
C5 C 0.2161(4) 0.0250(2) 0.8463(3) 0.0553(10) Uani 1 1 d . . .
H5A H 0.1394 0.0380 0.8365 0.083 Uiso 1 1 calc R . .
H5B H 0.2248 -0.0333 0.8528 0.083 Uiso 1 1 calc R . .
H5C H 0.2537 0.0439 0.7883 0.083 Uiso 1 1 calc R . .
C6 C 0.0601(3) 0.3815(2) 1.1259(2) 0.0363(7) Uani 1 1 d . . .
H6A H 0.0443 0.3386 1.0769 0.055 Uiso 1 1 calc R . .
H6B H -0.0074 0.4015 1.1509 0.055 Uiso 1 1 calc R . .
H6C H 0.1060 0.3605 1.1823 0.055 Uiso 1 1 calc R . .
C7 C 0.1180(2) 0.44997(19) 1.0756(2) 0.0296(6) Uani 1 1 d . . .
C8 C 0.1165(3) 0.5340(2) 1.0972(2) 0.0349(7) Uani 1 1 d . . .
H8A H 0.0796 0.5596 1.1487 0.042 Uiso 1 1 calc R . .
C9 C 0.1799(2) 0.57138(18) 1.0277(2) 0.0294(6) Uani 1 1 d . . .
C10 C 0.2060(3) 0.65974(19) 1.0126(3) 0.0398(7) Uani 1 1 d . . .
H10A H 0.2839 0.6663 1.0091 0.060 Uiso 1 1 calc R . .
H10B H 0.1816 0.6910 1.0693 0.060 Uiso 1 1 calc R . .
H10C H 0.1694 0.6788 0.9499 0.060 Uiso 1 1 calc R . .
C11 C 0.4854(3) 0.2631(2) 0.8748(3) 0.0399(7) Uani 1 1 d . . .
H11A H 0.4174 0.2336 0.8669 0.060 Uiso 1 1 calc R . .
H11B H 0.5228 0.2489 0.9393 0.060 Uiso 1 1 calc R . .
H11C H 0.5307 0.2491 0.8198 0.060 Uiso 1 1 calc R . .
C12 C 0.4629(2) 0.35224(19) 0.8725(2) 0.0306(6) Uani 1 1 d . . .
C13 C 0.5372(3) 0.4177(2) 0.8621(2) 0.0344(6) Uani 1 1 d . . .
H13A H 0.6123 0.4132 0.8551 0.041 Uiso 1 1 calc R . .
C14 C 0.4785(2) 0.48822(19) 0.8642(2) 0.0300(6) Uani 1 1 d . . .
C15 C 0.5142(3) 0.5756(2) 0.8543(3) 0.0393(7) Uani 1 1 d . . .
H15A H 0.5930 0.5782 0.8579 0.059 Uiso 1 1 calc R . .
H15B H 0.4868 0.6074 0.9091 0.059 Uiso 1 1 calc R . .
H15C H 0.4858 0.5972 0.7896 0.059 Uiso 1 1 calc R . .
C16 C 0.0165(3) 0.3536(2) 0.6616(3) 0.0375(7) Uani 1 1 d . . .
H16A H 0.0343 0.3084 0.7066 0.056 Uiso 1 1 calc R . .
H16B H 0.0298 0.3386 0.5924 0.056 Uiso 1 1 calc R . .
H16C H -0.0596 0.3676 0.6657 0.056 Uiso 1 1 calc R . .
C17 C 0.0862(2) 0.42557(18) 0.6932(2) 0.0293(6) Uani 1 1 d . . .
C18 C 0.0952(3) 0.5026(2) 0.6447(2) 0.0367(7) Uani 1 1 d . . .
H18A H 0.0586 0.5193 0.5836 0.044 Uiso 1 1 calc R . .
C19 C 0.1679(3) 0.54747(19) 0.7049(2) 0.0331(6) Uani 1 1 d . . .
C20 C 0.2087(4) 0.6330(2) 0.6918(3) 0.0497(9) Uani 1 1 d . . .
H20A H 0.2875 0.6331 0.6972 0.075 Uiso 1 1 calc R . .
H20B H 0.1816 0.6674 0.7443 0.075 Uiso 1 1 calc R . .
H20C H 0.1831 0.6533 0.6256 0.075 Uiso 1 1 calc R . .
C21 C 0.2750(2) 0.51649(17) 0.8745(2) 0.0263(6) Uani 1 1 d . . .
H21A H 0.2989 0.5735 0.8683 0.032 Uiso 1 1 calc R . .
B B 0.6723(3) 0.1840(2) 0.1386(3) 0.0386(8) Uani 1 1 d . . .
F1 F 0.6216(2) 0.25982(16) 0.13409(19) 0.0719(8) Uani 1 1 d . . .
F2 F 0.7324(3) 0.17063(14) 0.0542(2) 0.0756(9) Uani 1 1 d . . .
F3 F 0.5959(2) 0.12242(19) 0.1420(2) 0.0784(8) Uani 1 1 d . . .
F4 F 0.7392(2) 0.17832(17) 0.2274(2) 0.0695(7) Uani 1 1 d . . .

loop_
_atom_site_aniso_label
_atom_site_aniso_U_11
_atom_site_aniso_U_22
_atom_site_aniso_U_33
_atom_site_aniso_U_23
_atom_site_aniso_U_13
_atom_site_aniso_U_12
Cu 0.0383(2) 0.0229(2) 0.0326(2) -0.00012(13) 0.00176(15) -0.00204(14)
Se 0.0428(2) 0.02498(18) 0.03429(18) 0.00110(11) -0.00755(13) -0.00521(12)
N1 0.0470(16) 0.0299(14) 0.0398(14) -0.0002(11) -0.0093(12) -0.0001(12)
N2 0.0390(14) 0.0342(14) 0.0302(12) 0.0022(10) -0.0039(10) -0.0061(11)
N3 0.0361(13) 0.0227(12) 0.0266(11) -0.0023(9) 0.0048(9) -0.0015(10)
N7 0.0343(13) 0.0214(11) 0.0259(11) -0.0026(9) 0.0039(9) 0.0008(9)
N5 0.0343(13) 0.0229(12) 0.0325(12) -0.0013(9) 0.0011(10) 0.0017(10)
N6 0.0289(12) 0.0243(12) 0.0305(12) -0.0024(9) 0.0031(9) -0.0005(9)
N4 0.0326(12) 0.0245(12) 0.0256(11) -0.0016(9) -0.0001(9) 0.0013(10)
N8 0.0338(13) 0.0221(11) 0.0238(11) 0.0000(9) 0.0012(9) -0.0019(9)
C1 0.0380(16) 0.0291(15) 0.0313(14) 0.0030(12) -0.0007(12) -0.0058(12)
C2 0.058(2) 0.0418(19) 0.0320(16) -0.0052(14) -0.0068(14) -0.0080(17)
C3 0.0424(19) 0.048(2) 0.0425(17) 0.0088(15) -0.0082(14) -0.0013(16)
C4 0.048(2) 0.0395(19) 0.056(2) 0.0042(16) -0.0091(16) 0.0079(16)
C5 0.069(3) 0.0350(19) 0.059(2) -0.0159(17) -0.020(2) 0.0068(18)
C6 0.0419(17) 0.0392(17) 0.0283(14) 0.0025(12) 0.0054(12) -0.0030(14)
C7 0.0321(15) 0.0329(15) 0.0236(13) -0.0002(11) 0.0004(11) 0.0009(12)
C8 0.0415(17) 0.0370(17) 0.0267(14) -0.0056(12) 0.0055(12) 0.0045(13)
C9 0.0354(15) 0.0256(14) 0.0270(13) -0.0035(11) -0.0002(11) 0.0037(12)
C10 0.057(2) 0.0245(15) 0.0385(17) -0.0025(12) 0.0052(15) 0.0033(14)
C11 0.0428(18) 0.0337(17) 0.0430(17) -0.0027(14) 0.0011(14) 0.0079(14)
C12 0.0315(15) 0.0331(16) 0.0269(13) -0.0015(11) 0.0007(11) 0.0075(12)
C13 0.0290(15) 0.0389(17) 0.0353(15) -0.0030(13) 0.0004(11) 0.0009(13)
C14 0.0322(15) 0.0321(15) 0.0260(13) -0.0047(11) 0.0038(11) -0.0044(12)
C15 0.0360(17) 0.0345(17) 0.0480(18) -0.0027(14) 0.0081(13) -0.0077(14)
C16 0.0369(17) 0.0386(17) 0.0365(16) -0.0085(13) -0.0028(12) -0.0002(14)
C17 0.0298(14) 0.0321(15) 0.0263(13) -0.0045(11) 0.0032(10) 0.0024(12)
C18 0.0447(18) 0.0374(17) 0.0272(14) -0.0005(12) -0.0044(12) 0.0026(14)
C19 0.0422(17) 0.0315(16) 0.0255(13) 0.0019(11) 0.0015(12) 0.0023(13)
C20 0.073(3) 0.0346(18) 0.0403(18) 0.0116(15) -0.0084(17) -0.0104(18)
C21 0.0300(14) 0.0226(13) 0.0265(13) 0.0006(10) 0.0024(10) -0.0003(11)
B 0.042(2) 0.0348(19) 0.0394(19) 0.0031(16) 0.0065(15) 0.0040(16)
F1 0.098(2) 0.0655(16) 0.0532(14) 0.0045(12) 0.0104(13) 0.0467(15)
F2 0.121(2) 0.0404(13) 0.0722(16) 0.0061(11) 0.0578(17) 0.0116(14)
F3 0.0613(16) 0.089(2) 0.0864(19) -0.0162(16) 0.0172(14) -0.0337(15)
F4 0.0675(16) 0.0615(16) 0.0758(17) -0.0115(13) -0.0245(13) 0.0096(13)

_geom_special_details            
; 
 All esds (except the esd in the dihedral angle between two l.s. planes) 
 are estimated using the full covariance matrix.  The cell esds are taken 
 into account individually in the estimation of esds in distances, angles 
 and torsion angles; correlations between esds in cell parameters are only 
 used when they are defined by crystal symmetry.  An approximate (isotropic) 
 treatment of cell esds is used for estimating esds involving l.s. planes. 
;

loop_
_geom_bond_atom_site_label_1
_geom_bond_atom_site_label_2
_geom_bond_distance
_geom_bond_site_symmetry_2
_geom_bond_publ_flag
Cu N5 2.063(3) . ?
Cu N4 2.089(2) . ?
Cu N3 2.126(2) . ?
Cu Se 2.2981(6) . ?
Se C1 1.868(3) . ?
N1 C1 1.349(4) . ?
N1 C4 1.379(4) . ?
N1 C5 1.463(4) . ?
N2 C1 1.357(4) . ?
N2 C3 1.373(5) . ?
N2 C2 1.456(4) . ?
N3 C7 1.329(4) . ?
N3 N7 1.376(3) . ?
N7 C9 1.365(4) . ?
N7 C21 1.452(3) . ?
N5 C12 1.334(4) . ?
N5 N6 1.376(3) . ?
N6 C14 1.365(4) . ?
N6 C21 1.450(4) . ?
N4 C17 1.325(4) . ?
N4 N8 1.372(3) . ?
N8 C19 1.361(4) . ?
N8 C21 1.458(4) . ?
C2 H2A 0.9600 . ?
C2 H2B 0.9600 . ?
C2 H2C 0.9600 . ?
C3 C4 1.339(5) . ?
C3 H3A 0.9300 . ?
C4 H4A 0.9300 . ?
C5 H5A 0.9600 . ?
C5 H5B 0.9600 . ?
C5 H5C 0.9600 . ?
C6 C7 1.495(4) . ?
C6 H6A 0.9600 . ?
C6 H6B 0.9600 . ?
C6 H6C 0.9600 . ?
C7 C8 1.401(4) . ?
C8 C9 1.370(4) . ?
C8 H8A 0.9300 . ?
C9 C10 1.493(4) . ?
C10 H10A 0.9600 . ?
C10 H10B 0.9600 . ?
C10 H10C 0.9600 . ?
C11 C12 1.480(4) . ?
C11 H11A 0.9600 . ?
C11 H11B 0.9600 . ?
C11 H11C 0.9600 . ?
C12 C13 1.412(4) . ?
C13 C14 1.357(4) . ?
C13 H13A 0.9300 . ?
C14 C15 1.500(4) . ?
C15 H15A 0.9600 . ?
C15 H15B 0.9600 . ?
C15 H15C 0.9600 . ?
C16 C17 1.493(4) . ?
C16 H16A 0.9600 . ?
C16 H16B 0.9600 . ?
C16 H16C 0.9600 . ?
C17 C18 1.414(4) . ?
C18 C19 1.362(5) . ?
C18 H18A 0.9300 . ?
C19 C20 1.495(5) . ?
C20 H20A 0.9600 . ?
C20 H20B 0.9600 . ?
C20 H20C 0.9600 . ?
C21 H21A 0.9800 . ?
B F3 1.374(5) . ?
B F2 1.377(4) . ?
B F4 1.378(5) . ?
B F1 1.383(4) . ?

loop_
_geom_angle_atom_site_label_1
_geom_angle_atom_site_label_2
_geom_angle_atom_site_label_3
_geom_angle
_geom_angle_site_symmetry_1
_geom_angle_site_symmetry_3
_geom_angle_publ_flag
N5 Cu N4 88.66(10) . . ?
N5 Cu N3 87.66(10) . . ?
N4 Cu N3 85.67(9) . . ?
N5 Cu Se 132.37(7) . . ?
N4 Cu Se 123.04(7) . . ?
N3 Cu Se 125.46(7) . . ?
C1 Se Cu 108.24(10) . . ?
C1 N1 C4 109.7(3) . . ?
C1 N1 C5 124.8(3) . . ?
C4 N1 C5 125.4(3) . . ?
C1 N2 C3 109.8(3) . . ?
C1 N2 C2 126.2(3) . . ?
C3 N2 C2 124.0(3) . . ?
C7 N3 N7 105.1(2) . . ?
C7 N3 Cu 138.3(2) . . ?
N7 N3 Cu 114.77(16) . . ?
C9 N7 N3 111.6(2) . . ?
C9 N7 C21 128.2(2) . . ?
N3 N7 C21 118.9(2) . . ?
C12 N5 N6 105.4(2) . . ?
C12 N5 Cu 139.0(2) . . ?
N6 N5 Cu 115.57(18) . . ?
C14 N6 N5 111.6(2) . . ?
C14 N6 C21 128.6(2) . . ?
N5 N6 C21 119.6(2) . . ?
C17 N4 N8 105.5(2) . . ?
C17 N4 Cu 138.9(2) . . ?
N8 N4 Cu 115.38(17) . . ?
C19 N8 N4 111.6(2) . . ?
C19 N8 C21 129.4(2) . . ?
N4 N8 C21 119.0(2) . . ?
N1 C1 N2 105.8(3) . . ?
N1 C1 Se 124.2(2) . . ?
N2 C1 Se 129.9(2) . . ?
N2 C2 H2A 109.5 . . ?
N2 C2 H2B 109.5 . . ?
H2A C2 H2B 109.5 . . ?
N2 C2 H2C 109.5 . . ?
H2A C2 H2C 109.5 . . ?
H2B C2 H2C 109.5 . . ?
C4 C3 N2 107.3(3) . . ?
C4 C3 H3A 126.3 . . ?
N2 C3 H3A 126.3 . . ?
C3 C4 N1 107.3(3) . . ?
C3 C4 H4A 126.3 . . ?
N1 C4 H4A 126.3 . . ?
N1 C5 H5A 109.5 . . ?
N1 C5 H5B 109.5 . . ?
H5A C5 H5B 109.5 . . ?
N1 C5 H5C 109.5 . . ?
H5A C5 H5C 109.5 . . ?
H5B C5 H5C 109.5 . . ?
C7 C6 H6A 109.5 . . ?
C7 C6 H6B 109.5 . . ?
H6A C6 H6B 109.5 . . ?
C7 C6 H6C 109.5 . . ?
H6A C6 H6C 109.5 . . ?
H6B C6 H6C 109.5 . . ?
N3 C7 C8 110.7(3) . . ?
N3 C7 C6 120.1(3) . . ?
C8 C7 C6 129.2(3) . . ?
C9 C8 C7 106.8(3) . . ?
C9 C8 H8A 126.6 . . ?
C7 C8 H8A 126.6 . . ?
N7 C9 C8 105.8(3) . . ?
N7 C9 C10 123.6(3) . . ?
C8 C9 C10 130.6(3) . . ?
C9 C10 H10A 109.5 . . ?
C9 C10 H10B 109.5 . . ?
H10A C10 H10B 109.5 . . ?
C9 C10 H10C 109.5 . . ?
H10A C10 H10C 109.5 . . ?
H10B C10 H10C 109.5 . . ?
C12 C11 H11A 109.5 . . ?
C12 C11 H11B 109.5 . . ?
H11A C11 H11B 109.5 . . ?
C12 C11 H11C 109.5 . . ?
H11A C11 H11C 109.5 . . ?
H11B C11 H11C 109.5 . . ?
N5 C12 C13 109.7(3) . . ?
N5 C12 C11 121.5(3) . . ?
C13 C12 C11 128.7(3) . . ?
C14 C13 C12 107.3(3) . . ?
C14 C13 H13A 126.4 . . ?
C12 C13 H13A 126.4 . . ?
C13 C14 N6 106.1(3) . . ?
C13 C14 C15 130.4(3) . . ?
N6 C14 C15 123.5(3) . . ?
C14 C15 H15A 109.5 . . ?
C14 C15 H15B 109.5 . . ?
H15A C15 H15B 109.5 . . ?
C14 C15 H15C 109.5 . . ?
H15A C15 H15C 109.5 . . ?
H15B C15 H15C 109.5 . . ?
C17 C16 H16A 109.5 . . ?
C17 C16 H16B 109.5 . . ?
H16A C16 H16B 109.5 . . ?
C17 C16 H16C 109.5 . . ?
H16A C16 H16C 109.5 . . ?
H16B C16 H16C 109.5 . . ?
N4 C17 C18 110.1(3) . . ?
N4 C17 C16 120.5(3) . . ?
C18 C17 C16 129.4(3) . . ?
C19 C18 C17 106.6(3) . . ?
C19 C18 H18A 126.7 . . ?
C17 C18 H18A 126.7 . . ?
N8 C19 C18 106.2(3) . . ?
N8 C19 C20 123.6(3) . . ?
C18 C19 C20 130.2(3) . . ?
C19 C20 H20A 109.5 . . ?
C19 C20 H20B 109.5 . . ?
H20A C20 H20B 109.5 . . ?
C19 C20 H20C 109.5 . . ?
H20A C20 H20C 109.5 . . ?
H20B C20 H20C 109.5 . . ?
N6 C21 N7 111.9(2) . . ?
N6 C21 N8 111.2(2) . . ?
N7 C21 N8 111.3(2) . . ?
N6 C21 H21A 107.4 . . ?
N7 C21 H21A 107.4 . . ?
N8 C21 H21A 107.4 . . ?
F3 B F2 107.8(3) . . ?
F3 B F4 106.9(3) . . ?
F2 B F4 110.1(3) . . ?
F3 B F1 110.7(3) . . ?
F2 B F1 111.5(3) . . ?
F4 B F1 109.7(3) . . ?

_diffrn_measured_fraction_theta_max 0.994
_diffrn_reflns_theta_full        26.71
_diffrn_measured_fraction_theta_full 0.994
_refine_diff_density_max         0.808
_refine_diff_density_min         -0.682
_refine_diff_density_rms         0.084

#==========================================================================================
#==========================================================================================

#    END OF CIF

#==========================================================================================
#==========================================================================================

data_[Tpm*Cu(dmit)][BF4]

#==========================================================================================
_publ_section_references         
;
    ENTER OTHER REFERENCES

    Jacobson, R. (1998). <i>REQAB</i>. Version 1.1. Molecular Structure
Corporation, The Woodlands, Texas, USA.

Molecular Structure Corporation & Rigaku (2006). <i>CrystalClear</i> MSC, The
Woodlands, Texas, USA, and Rigaku Corporation, Tokyo, Japan.

Sheldrick, G. M. (2008). <i>SHELXTL</i>.Version 6.10 Acta Cryst. A64, 112-122.
;
_publ_section_exptl_refinement   
;
    ENTER SPECIAL DETAILS OF THE REFINEMENT
;
_audit_creation_method           SHELXL-97
_chemical_name_systematic        ?
_chemical_name_common            ?
_chemical_formula_moiety         'C21 H30 Cu N8 S, B F4'
_chemical_formula_sum            'C21 H30 B Cu F4 N8 S'
_chemical_properties_physical    'moisture-sensitive, air-sensitive'
_exptl_crystal_recrystallization_method 
'diffusion of ether into acetonitrile solution'
_chemical_melting_point          333-338

_exptl_crystal_description       Prism
_exptl_crystal_colour            colorless

_diffrn_ambient_temperature      163.15
_chemical_formula_weight         576.94

loop_
_atom_type_symbol
_atom_type_description
_atom_type_scat_dispersion_real
_atom_type_scat_dispersion_imag
_atom_type_scat_source
C C 0.0033 0.0016 'International Tables Vol C Tables 4.2.6.8 and 6.1.1.4'
H H 0.0000 0.0000 'International Tables Vol C Tables 4.2.6.8 and 6.1.1.4'
B B 0.0013 0.0007 'International Tables Vol C Tables 4.2.6.8 and 6.1.1.4'
N N 0.0061 0.0033 'International Tables Vol C Tables 4.2.6.8 and 6.1.1.4'
F F 0.0171 0.0103 'International Tables Vol C Tables 4.2.6.8 and 6.1.1.4'
S S 0.1246 0.1234 'International Tables Vol C Tables 4.2.6.8 and 6.1.1.4'
Cu Cu 0.3201 1.2651 'International Tables Vol C Tables 4.2.6.8 and 6.1.1.4'

_symmetry_cell_setting           monoclinic
_symmetry_space_group_name_H-M   'P 21/c'
_symmetry_int_tables_number      14
_chemical_absolute_configuration ?
_symmetry_space_group_name_Hall  '-P 2ybc'
loop_
_symmetry_equiv_pos_as_xyz
'x, y, z'
'-x, y+1/2, -z+1/2'
'-x, -y, -z'
'x, -y-1/2, z-1/2'

_cell_length_a                   12.248(2)
_cell_length_b                   16.233(3)
_cell_length_c                   12.914(3)
_cell_angle_alpha                90.00
_cell_angle_beta                 93.41(3)
_cell_angle_gamma                90.00
_cell_volume                     2563.2(9)
_cell_formula_units_Z            4
_cell_measurement_temperature    163.15
_cell_measurement_reflns_used    8486
_cell_measurement_theta_min      3.0115
_cell_measurement_theta_max      26.7334
_exptl_crystal_size_max          0.2000
_exptl_crystal_size_mid          0.2000
_exptl_crystal_size_min          0.2000
_exptl_crystal_density_meas      ?
_exptl_crystal_density_diffrn    1.495
_exptl_crystal_density_method    'not measured'
_exptl_crystal_F_000             1192
_exptl_absorpt_coefficient_mu    0.990
_exptl_absorpt_correction_type   multi-scan
_exptl_absorpt_correction_T_min  0.7563
_exptl_absorpt_correction_T_max  0.8200
_exptl_absorpt_process_details   'REQAB, CrystalClear'

_exptl_special_details           
; 
 ? 
;
_diffrn_radiation_probe          x-ray
_diffrn_radiation_type           MoK\a
_diffrn_radiation_wavelength     0.71073
_diffrn_source                   'fine-focus sealed tube'
_diffrn_source_type              'Rigaku Mercury CCD '
_diffrn_radiation_monochromator  graphite
_diffrn_measurement_device_type  'Rigaku AFC8S'
_diffrn_measurement_method       dtprofit.ref
_diffrn_detector_area_resol_mean 14.6306
_diffrn_standards_number         0
_diffrn_standards_interval_count 0
_diffrn_standards_interval_time  0
_diffrn_standards_decay_%        0
_diffrn_reflns_number            22159
_diffrn_reflns_av_R_equivalents  0.0280
_diffrn_reflns_av_sigmaI/netI    0.0229
_diffrn_reflns_limit_h_min       -15
_diffrn_reflns_limit_h_max       13
_diffrn_reflns_limit_k_min       -20
_diffrn_reflns_limit_k_max       19
_diffrn_reflns_limit_l_min       -16
_diffrn_reflns_limit_l_max       16
_diffrn_reflns_theta_min         3.01
_diffrn_reflns_theta_max         26.73
_reflns_number_total             5406
_reflns_number_gt                4788
_reflns_threshold_expression     >2sigma(I)

_computing_data_collection       'CrystalClear (Rigaku/MSC,2006)'
_computing_cell_refinement       'CrystalClear (Rigaku/MSC,2006)'
_computing_data_reduction        'CrystalClear (Rigaku/MSC,2006)'
_computing_structure_solution    'SHELXTL 6.10 (Sheldrick,2008)'
_computing_structure_refinement  'SHELXTL 6.10 (Sheldrick,2008)'
_computing_molecular_graphics    'SHELXTL 6.10 (Sheldrick,2008)'
_computing_publication_material  'SHELXTL 6.10 (Sheldrick,2008)'

_refine_special_details          
; 
 Refinement of F^2^ against ALL reflections.  The weighted R-factor wR and 
 goodness of fit S are based on F^2^, conventional R-factors R are based 
 on F, with F set to zero for negative F^2^. The threshold expression of 
 F^2^ > 2sigma(F^2^) is used only for calculating R-factors(gt) etc. and is 
 not relevant to the choice of reflections for refinement.  R-factors based 
 on F^2^ are statistically about twice as large as those based on F, and R- 
 factors based on ALL data will be even larger. 
;

_refine_ls_structure_factor_coef Fsqd
_refine_ls_matrix_type           full
_refine_ls_weighting_scheme      calc
_refine_ls_weighting_details     
'calc w=1/[\s^2^(Fo^2^)+(0.0843P)^2^+1.5767P] where P=(Fo^2^+2Fc^2^)/3'
_atom_sites_solution_primary     direct
_atom_sites_solution_secondary   difmap
_atom_sites_solution_hydrogens   geom
_refine_ls_hydrogen_treatment    constr
_refine_ls_extinction_method     none
_refine_ls_extinction_coef       0
_refine_ls_number_reflns         5406
_refine_ls_number_parameters     333
_refine_ls_number_restraints     0
_refine_ls_R_factor_all          0.0557
_refine_ls_R_factor_gt           0.0503
_refine_ls_wR_factor_ref         0.1426
_refine_ls_wR_factor_gt          0.1349
_refine_ls_goodness_of_fit_ref   1.098
_refine_ls_restrained_S_all      1.098
_refine_ls_shift/su_max          0.000
_refine_ls_shift/su_mean         0.000

loop_
_atom_site_label
_atom_site_type_symbol
_atom_site_fract_x
_atom_site_fract_y
_atom_site_fract_z
_atom_site_U_iso_or_equiv
_atom_site_adp_type
_atom_site_occupancy
_atom_site_symmetry_multiplicity
_atom_site_calc_flag
_atom_site_refinement_flags
_atom_site_disorder_assembly
_atom_site_disorder_group
Cu1 Cu 0.29571(2) 0.165077(17) 0.10817(2) 0.03011(13) Uani 1 1 d . . .
S1 S 0.35585(5) 0.29169(4) 0.09697(5) 0.03330(17) Uani 1 1 d . . .
N1 N 0.19887(18) 0.33991(12) -0.05617(17) 0.0316(5) Uani 1 1 d . . .
N2 N 0.23811(19) 0.43168(13) 0.06190(18) 0.0368(5) Uani 1 1 d . . .
N3 N 0.34807(16) 0.07978(11) 0.22229(15) 0.0264(4) Uani 1 1 d . . .
N4 N 0.13774(17) 0.12054(12) 0.11813(16) 0.0287(4) Uani 1 1 d . . .
N5 N 0.32105(17) 0.06784(12) 0.00108(15) 0.0274(4) Uani 1 1 d . . .
N6 N 0.28164(16) -0.00750(11) 0.02920(15) 0.0260(4) Uani 1 1 d . . .
N7 N 0.12832(16) 0.03640(12) 0.12323(15) 0.0271(4) Uani 1 1 d . . .
N8 N 0.29882(16) 0.00367(12) 0.21440(15) 0.0261(4) Uani 1 1 d . . .
C1 C 0.2616(2) 0.35353(15) 0.03249(19) 0.0302(5) Uani 1 1 d . . .
C2 C 0.1947(2) 0.26438(18) -0.1172(2) 0.0411(6) Uani 1 1 d . . .
H2A H 0.2233 0.2196 -0.0753 0.062 Uiso 1 1 calc R . .
H2B H 0.2378 0.2710 -0.1763 0.062 Uiso 1 1 calc R . .
H2C H 0.1203 0.2528 -0.1401 0.062 Uiso 1 1 calc R . .
C3 C 0.2841(3) 0.47164(18) 0.1551(3) 0.0499(8) Uani 1 1 d . . .
H3A H 0.3623 0.4661 0.1585 0.075 Uiso 1 1 calc R . .
H3B H 0.2555 0.4463 0.2149 0.075 Uiso 1 1 calc R . .
H3C H 0.2650 0.5290 0.1535 0.075 Uiso 1 1 calc R . .
C4 C 0.1619(2) 0.46659(18) -0.0086(2) 0.0451(7) Uani 1 1 d . . .
H4A H 0.1331 0.5195 -0.0058 0.054 Uiso 1 1 calc R . .
C5 C 0.1373(2) 0.40937(18) -0.0820(2) 0.0397(6) Uani 1 1 d . . .
H5A H 0.0883 0.4154 -0.1393 0.048 Uiso 1 1 calc R . .
C6 C 0.4131(2) 0.07686(15) 0.30857(19) 0.0291(5) Uani 1 1 d . . .
C7 C 0.4819(2) 0.14955(17) 0.3410(2) 0.0368(6) Uani 1 1 d . . .
H7A H 0.4631 0.1954 0.2965 0.055 Uiso 1 1 calc R . .
H7B H 0.5577 0.1361 0.3358 0.055 Uiso 1 1 calc R . .
H7C H 0.4692 0.1637 0.4114 0.055 Uiso 1 1 calc R . .
C8 C 0.4047(2) -0.00112(16) 0.3562(2) 0.0358(5) Uani 1 1 d . . .
H8A H 0.4414 -0.0183 0.4175 0.043 Uiso 1 1 calc R . .
C9 C 0.3328(2) -0.04636(15) 0.29510(18) 0.0323(5) Uani 1 1 d . . .
C10 C 0.2931(3) -0.13292(18) 0.3074(2) 0.0470(7) Uani 1 1 d . . .
H10A H 0.3216 -0.1546 0.3726 0.070 Uiso 1 1 calc R . .
H10B H 0.3175 -0.1663 0.2519 0.070 Uiso 1 1 calc R . .
H10C H 0.2146 -0.1332 0.3054 0.070 Uiso 1 1 calc R . .
C11 C 0.0369(2) 0.14952(16) 0.12723(19) 0.0298(5) Uani 1 1 d . . .
C12 C 0.0144(2) 0.23957(16) 0.1243(2) 0.0376(6) Uani 1 1 d . . .
H12A H 0.0820 0.2693 0.1340 0.056 Uiso 1 1 calc R . .
H12B H -0.0325 0.2536 0.1786 0.056 Uiso 1 1 calc R . .
H12C H -0.0209 0.2539 0.0583 0.056 Uiso 1 1 calc R . .
C13 C -0.0363(2) 0.08412(16) 0.1387(2) 0.0323(5) Uani 1 1 d . . .
H13A H -0.1111 0.0884 0.1464 0.039 Uiso 1 1 calc R . .
C14 C 0.0234(2) 0.01270(16) 0.13647(18) 0.0294(5) Uani 1 1 d . . .
C15 C -0.0123(2) -0.07473(16) 0.1469(2) 0.0378(6) Uani 1 1 d . . .
H15A H 0.0129 -0.1065 0.0904 0.057 Uiso 1 1 calc R . .
H15B H -0.0907 -0.0770 0.1458 0.057 Uiso 1 1 calc R . .
H15C H 0.0180 -0.0968 0.2113 0.057 Uiso 1 1 calc R . .
C16 C 0.38417(19) 0.05256(14) -0.07709(17) 0.0269(5) Uani 1 1 d . . .
C17 C 0.4424(2) 0.12141(16) -0.1272(2) 0.0349(5) Uani 1 1 d . . .
H17A H 0.4544 0.1656 -0.0784 0.052 Uiso 1 1 calc R . .
H17B H 0.3987 0.1409 -0.1863 0.052 Uiso 1 1 calc R . .
H17C H 0.5114 0.1020 -0.1489 0.052 Uiso 1 1 calc R . .
C18 C 0.3849(2) -0.03190(16) -0.09958(19) 0.0322(5) Uani 1 1 d . . .
H18A H 0.4216 -0.0574 -0.1518 0.039 Uiso 1 1 calc R . .
C19 C 0.3211(2) -0.06982(14) -0.02964(18) 0.0283(5) Uani 1 1 d . . .
C20 C 0.2945(3) -0.15859(15) -0.0152(2) 0.0371(6) Uani 1 1 d . . .
H20A H 0.2168 -0.1650 -0.0123 0.056 Uiso 1 1 calc R . .
H20B H 0.3303 -0.1781 0.0482 0.056 Uiso 1 1 calc R . .
H20C H 0.3193 -0.1898 -0.0724 0.056 Uiso 1 1 calc R . .
C21 C 0.22527(19) -0.01463(14) 0.12441(17) 0.0253(4) Uani 1 1 d . . .
H21A H 0.2018 -0.0721 0.1305 0.030 Uiso 1 1 calc R . .
B1 B 0.1743(3) -0.31734(19) 0.1380(2) 0.0363(6) Uani 1 1 d . . .
F1 F 0.1241(2) -0.24053(13) 0.13377(16) 0.0665(6) Uani 1 1 d . . .
F2 F 0.2360(2) -0.32927(11) 0.05362(18) 0.0654(7) Uani 1 1 d . . .
F3 F 0.09759(17) -0.37901(15) 0.13853(19) 0.0701(6) Uani 1 1 d . . .
F4 F 0.23950(19) -0.32312(13) 0.22834(18) 0.0636(6) Uani 1 1 d . . .

loop_
_atom_site_aniso_label
_atom_site_aniso_U_11
_atom_site_aniso_U_22
_atom_site_aniso_U_33
_atom_site_aniso_U_23
_atom_site_aniso_U_13
_atom_site_aniso_U_12
Cu1 0.0368(2) 0.02333(19) 0.0303(2) -0.00005(10) 0.00218(14) -0.00152(10)
S1 0.0409(3) 0.0255(3) 0.0323(3) 0.0012(2) -0.0075(3) -0.0039(2)
N1 0.0355(11) 0.0326(11) 0.0262(11) 0.0014(8) -0.0024(9) -0.0048(8)
N2 0.0437(12) 0.0307(11) 0.0351(12) -0.0014(9) -0.0058(10) 0.0017(9)
N3 0.0295(10) 0.0235(9) 0.0260(10) -0.0017(7) 0.0005(8) 0.0005(7)
N4 0.0323(10) 0.0260(9) 0.0276(10) -0.0016(7) 0.0003(8) 0.0012(8)
N5 0.0366(10) 0.0219(9) 0.0239(10) -0.0015(7) 0.0038(8) -0.0025(8)
N6 0.0327(10) 0.0207(9) 0.0249(9) -0.0020(7) 0.0038(8) 0.0006(7)
N7 0.0290(10) 0.0248(9) 0.0276(10) -0.0015(7) 0.0025(8) -0.0004(8)
N8 0.0312(10) 0.0242(9) 0.0230(9) 0.0004(7) 0.0009(8) -0.0002(7)
C1 0.0356(12) 0.0284(11) 0.0264(12) 0.0015(9) -0.0010(10) -0.0059(10)
C2 0.0533(16) 0.0387(15) 0.0303(13) -0.0040(10) -0.0061(12) -0.0076(12)
C3 0.0607(19) 0.0333(14) 0.0530(19) -0.0127(13) -0.0180(15) 0.0057(13)
C4 0.0465(16) 0.0383(14) 0.0488(17) 0.0023(12) -0.0113(13) 0.0068(12)
C5 0.0367(14) 0.0445(15) 0.0370(14) 0.0053(11) -0.0066(11) -0.0004(11)
C6 0.0298(11) 0.0313(12) 0.0261(11) -0.0043(9) 0.0021(9) 0.0027(9)
C7 0.0360(13) 0.0388(13) 0.0350(14) -0.0076(11) -0.0025(11) -0.0018(11)
C8 0.0434(14) 0.0383(14) 0.0248(12) 0.0018(10) -0.0048(10) 0.0020(11)
C9 0.0435(13) 0.0306(12) 0.0227(11) 0.0007(9) 0.0020(10) 0.0007(10)
C10 0.070(2) 0.0349(14) 0.0352(14) 0.0099(11) -0.0053(13) -0.0081(13)
C11 0.0323(12) 0.0323(12) 0.0247(11) -0.0022(9) 0.0012(9) 0.0047(10)
C12 0.0422(14) 0.0323(13) 0.0379(14) -0.0021(10) -0.0007(11) 0.0089(11)
C13 0.0289(12) 0.0380(13) 0.0301(12) -0.0048(10) 0.0033(10) 0.0023(10)
C14 0.0309(12) 0.0349(12) 0.0225(11) -0.0026(9) 0.0032(9) -0.0015(9)
C15 0.0361(13) 0.0354(13) 0.0427(15) -0.0025(11) 0.0078(11) -0.0076(11)
C16 0.0291(11) 0.0309(11) 0.0205(10) -0.0009(8) 0.0007(8) 0.0027(9)
C17 0.0409(14) 0.0360(13) 0.0285(12) 0.0004(10) 0.0073(10) -0.0029(11)
C18 0.0400(13) 0.0332(12) 0.0240(11) -0.0016(9) 0.0070(10) 0.0045(10)
C19 0.0339(12) 0.0254(11) 0.0254(11) -0.0035(8) 0.0015(9) 0.0028(9)
C20 0.0505(16) 0.0253(12) 0.0357(14) -0.0027(9) 0.0045(12) 0.0009(10)
C21 0.0306(11) 0.0232(10) 0.0224(11) -0.0005(8) 0.0030(9) -0.0025(8)
B1 0.0390(15) 0.0336(14) 0.0366(15) 0.0031(12) 0.0058(12) 0.0044(12)
F1 0.0915(15) 0.0607(12) 0.0481(11) 0.0035(9) 0.0100(10) 0.0418(11)
F2 0.0988(17) 0.0398(10) 0.0627(13) 0.0045(8) 0.0477(13) 0.0083(9)
F3 0.0535(12) 0.0840(16) 0.0739(15) -0.0171(12) 0.0150(10) -0.0297(11)
F4 0.0655(13) 0.0579(12) 0.0640(13) -0.0095(9) -0.0254(11) 0.0070(9)

_geom_special_details            
; 
 All esds (except the esd in the dihedral angle between two l.s. planes) 
 are estimated using the full covariance matrix.  The cell esds are taken 
 into account individually in the estimation of esds in distances, angles 
 and torsion angles; correlations between esds in cell parameters are only 
 used when they are defined by crystal symmetry.  An approximate (isotropic) 
 treatment of cell esds is used for estimating esds involving l.s. planes. 
;

loop_
_geom_bond_atom_site_label_1
_geom_bond_atom_site_label_2
_geom_bond_distance
_geom_bond_site_symmetry_2
_geom_bond_publ_flag
Cu1 N4 2.077(2) . ?
Cu1 N3 2.095(2) . ?
Cu1 N5 2.1334(19) . ?
Cu1 S1 2.1909(8) . ?
S1 C1 1.709(3) . ?
N1 C1 1.359(3) . ?
N1 C5 1.386(4) . ?
N1 C2 1.456(3) . ?
N2 C1 1.360(3) . ?
N2 C4 1.386(4) . ?
N2 C3 1.451(4) . ?
N3 C6 1.331(3) . ?
N3 N8 1.376(3) . ?
N4 C11 1.334(3) . ?
N4 N7 1.373(3) . ?
N5 C16 1.331(3) . ?
N5 N6 1.372(3) . ?
N6 C19 1.370(3) . ?
N6 C21 1.450(3) . ?
N7 C14 1.362(3) . ?
N7 C21 1.447(3) . ?
N8 C9 1.367(3) . ?
N8 C21 1.458(3) . ?
C2 H2A 0.9600 . ?
C2 H2B 0.9600 . ?
C2 H2C 0.9600 . ?
C3 H3A 0.9600 . ?
C3 H3B 0.9600 . ?
C3 H3C 0.9600 . ?
C4 C5 1.348(4) . ?
C4 H4A 0.9300 . ?
C5 H5A 0.9300 . ?
C6 C8 1.414(4) . ?
C6 C7 1.496(3) . ?
C7 H7A 0.9600 . ?
C7 H7B 0.9600 . ?
C7 H7C 0.9600 . ?
C8 C9 1.362(4) . ?
C8 H8A 0.9300 . ?
C9 C10 1.499(4) . ?
C10 H10A 0.9600 . ?
C10 H10B 0.9600 . ?
C10 H10C 0.9600 . ?
C11 C13 1.403(4) . ?
C11 C12 1.488(3) . ?
C12 H12A 0.9600 . ?
C12 H12B 0.9600 . ?
C12 H12C 0.9600 . ?
C13 C14 1.372(4) . ?
C13 H13A 0.9300 . ?
C14 C15 1.493(4) . ?
C15 H15A 0.9600 . ?
C15 H15B 0.9600 . ?
C15 H15C 0.9600 . ?
C16 C18 1.402(3) . ?
C16 C17 1.494(3) . ?
C17 H17A 0.9600 . ?
C17 H17B 0.9600 . ?
C17 H17C 0.9600 . ?
C18 C19 1.375(3) . ?
C18 H18A 0.9300 . ?
C19 C20 1.491(3) . ?
C20 H20A 0.9600 . ?
C20 H20B 0.9600 . ?
C20 H20C 0.9600 . ?
C21 H21A 0.9800 . ?
B1 F3 1.373(4) . ?
B1 F2 1.377(4) . ?
B1 F4 1.378(4) . ?
B1 F1 1.389(4) . ?

loop_
_geom_shortbond_distance
Cu1
H2A
2.633
S1
H7B
2.931
F1
H12C
2.726
F2
H10A
2.631
F3
H5A
2.352
F4
H3C
2.614

loop_
_geom_angle_atom_site_label_1
_geom_angle_atom_site_label_2
_geom_angle_atom_site_label_3
_geom_angle
_geom_angle_site_symmetry_1
_geom_angle_site_symmetry_3
_geom_angle_publ_flag
N4 Cu1 N3 88.49(8) . . ?
N4 Cu1 N5 87.40(8) . . ?
N3 Cu1 N5 85.23(8) . . ?
N4 Cu1 S1 130.45(6) . . ?
N3 Cu1 S1 125.20(6) . . ?
N5 Cu1 S1 126.07(6) . . ?
C1 S1 Cu1 111.30(9) . . ?
C1 N1 C5 110.0(2) . . ?
C1 N1 C2 126.3(2) . . ?
C5 N1 C2 123.6(2) . . ?
C1 N2 C4 110.1(2) . . ?
C1 N2 C3 124.8(2) . . ?
C4 N2 C3 125.1(2) . . ?
C6 N3 N8 105.53(19) . . ?
C6 N3 Cu1 139.05(16) . . ?
N8 N3 Cu1 115.27(15) . . ?
C11 N4 N7 105.4(2) . . ?
C11 N4 Cu1 138.95(17) . . ?
N7 N4 Cu1 115.51(15) . . ?
C16 N5 N6 105.32(18) . . ?
C16 N5 Cu1 137.99(16) . . ?
N6 N5 Cu1 114.89(14) . . ?
C19 N6 N5 111.73(19) . . ?
C19 N6 C21 127.76(19) . . ?
N5 N6 C21 119.25(18) . . ?
C14 N7 N4 111.70(19) . . ?
C14 N7 C21 128.1(2) . . ?
N4 N7 C21 119.92(19) . . ?
C9 N8 N3 111.38(19) . . ?
C9 N8 C21 129.2(2) . . ?
N3 N8 C21 119.30(18) . . ?
N1 C1 N2 105.6(2) . . ?
N1 C1 S1 130.3(2) . . ?
N2 C1 S1 124.1(2) . . ?
N1 C2 H2A 109.5 . . ?
N1 C2 H2B 109.5 . . ?
H2A C2 H2B 109.5 . . ?
N1 C2 H2C 109.5 . . ?
H2A C2 H2C 109.5 . . ?
H2B C2 H2C 109.5 . . ?
N2 C3 H3A 109.5 . . ?
N2 C3 H3B 109.5 . . ?
H3A C3 H3B 109.5 . . ?
N2 C3 H3C 109.5 . . ?
H3A C3 H3C 109.5 . . ?
H3B C3 H3C 109.5 . . ?
C5 C4 N2 107.1(3) . . ?
C5 C4 H4A 126.5 . . ?
N2 C4 H4A 126.5 . . ?
C4 C5 N1 107.2(2) . . ?
C4 C5 H5A 126.4 . . ?
N1 C5 H5A 126.4 . . ?
N3 C6 C8 109.9(2) . . ?
N3 C6 C7 120.4(2) . . ?
C8 C6 C7 129.7(2) . . ?
C6 C7 H7A 109.5 . . ?
C6 C7 H7B 109.5 . . ?
H7A C7 H7B 109.5 . . ?
C6 C7 H7C 109.5 . . ?
H7A C7 H7C 109.5 . . ?
H7B C7 H7C 109.5 . . ?
C9 C8 C6 107.0(2) . . ?
C9 C8 H8A 126.5 . . ?
C6 C8 H8A 126.5 . . ?
C8 C9 N8 106.2(2) . . ?
C8 C9 C10 130.4(2) . . ?
N8 C9 C10 123.5(2) . . ?
C9 C10 H10A 109.5 . . ?
C9 C10 H10B 109.5 . . ?
H10A C10 H10B 109.5 . . ?
C9 C10 H10C 109.5 . . ?
H10A C10 H10C 109.5 . . ?
H10B C10 H10C 109.5 . . ?
N4 C11 C13 110.1(2) . . ?
N4 C11 C12 121.0(2) . . ?
C13 C11 C12 128.9(2) . . ?
C11 C12 H12A 109.5 . . ?
C11 C12 H12B 109.5 . . ?
H12A C12 H12B 109.5 . . ?
C11 C12 H12C 109.5 . . ?
H12A C12 H12C 109.5 . . ?
H12B C12 H12C 109.5 . . ?
C14 C13 C11 107.0(2) . . ?
C14 C13 H13A 126.5 . . ?
C11 C13 H13A 126.5 . . ?
N7 C14 C13 105.8(2) . . ?
N7 C14 C15 124.3(2) . . ?
C13 C14 C15 130.0(2) . . ?
C14 C15 H15A 109.5 . . ?
C14 C15 H15B 109.5 . . ?
H15A C15 H15B 109.5 . . ?
C14 C15 H15C 109.5 . . ?
H15A C15 H15C 109.5 . . ?
H15B C15 H15C 109.5 . . ?
N5 C16 C18 110.5(2) . . ?
N5 C16 C17 120.2(2) . . ?
C18 C16 C17 129.3(2) . . ?
C16 C17 H17A 109.5 . . ?
C16 C17 H17B 109.5 . . ?
H17A C17 H17B 109.5 . . ?
C16 C17 H17C 109.5 . . ?
H17A C17 H17C 109.5 . . ?
H17B C17 H17C 109.5 . . ?
C19 C18 C16 106.9(2) . . ?
C19 C18 H18A 126.6 . . ?
C16 C18 H18A 126.6 . . ?
N6 C19 C18 105.5(2) . . ?
N6 C19 C20 123.9(2) . . ?
C18 C19 C20 130.6(2) . . ?
C19 C20 H20A 109.5 . . ?
C19 C20 H20B 109.5 . . ?
H20A C20 H20B 109.5 . . ?
C19 C20 H20C 109.5 . . ?
H20A C20 H20C 109.5 . . ?
H20B C20 H20C 109.5 . . ?
N7 C21 N6 112.15(18) . . ?
N7 C21 N8 111.07(18) . . ?
N6 C21 N8 110.90(18) . . ?
N7 C21 H21A 107.5 . . ?
N6 C21 H21A 107.5 . . ?
N8 C21 H21A 107.5 . . ?
F3 B1 F2 108.0(3) . . ?
F3 B1 F4 108.0(3) . . ?
F2 B1 F4 110.0(3) . . ?
F3 B1 F1 110.7(3) . . ?
F2 B1 F1 110.9(2) . . ?
F4 B1 F1 109.1(3) . . ?

_diffrn_measured_fraction_theta_max 0.992
_diffrn_reflns_theta_full        26.73
_diffrn_measured_fraction_theta_full 0.992
_refine_diff_density_max         1.014
_refine_diff_density_min         -0.676
_refine_diff_density_rms         0.081

#==========================================================================================
#==========================================================================================

#     END OF CIF

#==========================================================================================
#==========================================================================================
 
data_[TpmCu(dmise)][BF4]

#==========================================================================================
_publ_section_references         
;
ENTER OTHER REFERENCES

Jacobson, R. (1998). <i>REQAB</i>. Version 1.1. Molecular Structure
Corporation, The Woodlands, Texas, USA.

Molecular Structure Corporation & Rigaku (2006). <i>CrystalClear</i> MSC, The
Woodlands, Texas, USA, and Rigaku Corporation, Tokyo, Japan.

Sheldrick, G. M. (2008). <i>SHELXTL</i>.Version 6.10 Acta Cryst. A64, 112-122.
;
_publ_section_exptl_refinement   
;
ENTER SPECIAL DETAILS OF THE REFINEMENT
;
_audit_creation_method           SHELXL-97
_chemical_name_systematic        ?
_chemical_name_common            ?
_chemical_formula_moiety         'C15 H18 Cu N8 Se, B F4'
_chemical_formula_sum            'C15 H18 B Cu F4 N8 Se'
_chemical_properties_physical    'air-sensitive, moisture-sensitive'
_chemical_melting_point          ?

_exptl_crystal_description       rods
_exptl_crystal_colour            colorless

_diffrn_ambient_temperature      168.15
_chemical_formula_weight         539.69


loop_
_atom_type_symbol
_atom_type_description
_atom_type_scat_dispersion_real
_atom_type_scat_dispersion_imag
_atom_type_scat_source
C C 0.0033 0.0016 'International Tables Vol C Tables 4.2.6.8 and 6.1.1.4'
H H 0.0000 0.0000 'International Tables Vol C Tables 4.2.6.8 and 6.1.1.4'
B B 0.0013 0.0007 'International Tables Vol C Tables 4.2.6.8 and 6.1.1.4'
Cu Cu 0.3201 1.2651 'International Tables Vol C Tables 4.2.6.8 and 6.1.1.4'
F F 0.0171 0.0103 'International Tables Vol C Tables 4.2.6.8 and 6.1.1.4'
N N 0.0061 0.0033 'International Tables Vol C Tables 4.2.6.8 and 6.1.1.4'
Se Se -0.0929 2.2259 'International Tables Vol C Tables 4.2.6.8 and 6.1.1.4'

_symmetry_cell_setting           monoclinic
_symmetry_space_group_name_H-M   'P 21/c'
_symmetry_int_tables_number      14
_chemical_absolute_configuration ?
_symmetry_space_group_name_Hall  '-P 2ybc'

loop_
_symmetry_equiv_pos_as_xyz
'x, y, z'
'-x, y+1/2, -z+1/2'
'-x, -y, -z'
'x, -y-1/2, z-1/2'

_cell_length_a                   10.176(2)
_cell_length_b                   17.734(3)
_cell_length_c                   22.586(4)
_cell_angle_alpha                90.00
_cell_angle_beta                 96.47(3)
_cell_angle_gamma                90.00
_cell_volume                     4049.9(13)
_cell_formula_units_Z            8
_cell_measurement_temperature    168.15
_cell_measurement_reflns_used    30276
_cell_measurement_theta_min      2.96
_cell_measurement_theta_max      25.05

_exptl_crystal_size_max          0.31
_exptl_crystal_size_mid          0.28
_exptl_crystal_size_min          0.22
_exptl_crystal_density_meas      ?
_exptl_crystal_density_diffrn    1.770
_exptl_crystal_density_method    'not measured'
_exptl_crystal_F_000             2144
_exptl_absorpt_coefficient_mu    2.932
_exptl_absorpt_correction_type   multi-scan
_exptl_absorpt_correction_T_min  0.8949
_exptl_absorpt_correction_T_max  0.9237
_exptl_absorpt_process_details   'REQAB, CrystalClear'

_exptl_special_details           
; 
 ? 
;
_diffrn_radiation_probe          x-ray
_diffrn_radiation_type           MoK\a

_diffrn_radiation_wavelength     0.71073
_diffrn_source                   'fine-focus sealed tube'
_diffrn_radiation_monochromator  graphite
_diffrn_measurement_device_type  'Rigaku AFC8S'
_diffrn_measurement_method       dtprofit.ref
_diffrn_detector_area_resol_mean 14.6306
_diffrn_standards_number         0
_diffrn_standards_interval_count 0
_diffrn_standards_interval_time  0
_diffrn_standards_decay_%        0
_diffrn_reflns_number            30276
_diffrn_reflns_av_R_equivalents  0.0699
_diffrn_reflns_av_sigmaI/netI    0.0455
_diffrn_reflns_limit_h_min       -12
_diffrn_reflns_limit_h_max       11
_diffrn_reflns_limit_k_min       -21
_diffrn_reflns_limit_k_max       21
_diffrn_reflns_limit_l_min       -24
_diffrn_reflns_limit_l_max       26
_diffrn_reflns_theta_min         2.96
_diffrn_reflns_theta_max         25.05
_reflns_number_total             7119
_reflns_number_gt                6555
_reflns_threshold_expression     >2sigma(I)

_computing_data_collection       'CrystalClear (Rigaku/MSC,2006)'
_computing_cell_refinement       'CrystalClear (Rigaku/MSC,2006)'
_computing_data_reduction        'CrystalClear (Rigaku/MSC,2006)'
_computing_structure_solution    'SHELXTL 6.10 (Sheldrick,2008)'
_computing_structure_refinement  'SHELXTL 6.10 (Sheldrick,2008)'
_computing_molecular_graphics    'SHELXTL 6.10 (Sheldrick,2008)'
_computing_publication_material  'SHELXTL 6.10 (Sheldrick,2008)'

_refine_special_details          
; 
 Refinement of F^2^ against ALL reflections.  The weighted R-factor wR and 
 goodness of fit S are based on F^2^, conventional R-factors R are based 
 on F, with F set to zero for negative F^2^. The threshold expression of 
 F^2^ > 2sigma(F^2^) is used only for calculating R-factors(gt) etc. and is 
 not relevant to the choice of reflections for refinement.  R-factors based 
 on F^2^ are statistically about twice as large as those based on F, and R- 
 factors based on ALL data will be even larger. 
;

_refine_ls_structure_factor_coef Fsqd
_refine_ls_matrix_type           full
_refine_ls_weighting_scheme      calc
_refine_ls_weighting_details     
'calc w=1/[\s^2^(Fo^2^)+(0.0298P)^2^+46.6999P] where P=(Fo^2^+2Fc^2^)/3'
_atom_sites_solution_primary     direct
_atom_sites_solution_secondary   difmap
_atom_sites_solution_hydrogens   geom
_refine_ls_hydrogen_treatment    constr
_refine_ls_extinction_method     SHELXL
_refine_ls_extinction_coef       0.0014(3)
_refine_ls_extinction_expression Fc^*^=kFc[1+0.001xFc^2^\l^3^/sin(2\q)]^-1/4^
_refine_ls_number_reflns         7119
_refine_ls_number_parameters     546
_refine_ls_number_restraints     0
_refine_ls_R_factor_all          0.0741
_refine_ls_R_factor_gt           0.0692
_refine_ls_wR_factor_ref         0.1732
_refine_ls_wR_factor_gt          0.1713
_refine_ls_goodness_of_fit_ref   1.179
_refine_ls_restrained_S_all      1.179
_refine_ls_shift/su_max          0.000
_refine_ls_shift/su_mean         0.000

loop_
_atom_site_label
_atom_site_type_symbol
_atom_site_fract_x
_atom_site_fract_y
_atom_site_fract_z
_atom_site_U_iso_or_equiv
_atom_site_adp_type
_atom_site_occupancy
_atom_site_symmetry_multiplicity
_atom_site_calc_flag
_atom_site_refinement_flags
_atom_site_disorder_assembly
_atom_site_disorder_group
Cu1 Cu 0.46704(9) -0.02797(5) 0.14104(4) 0.0317(3) Uani 1 1 d . . .
Cu1A Cu 0.96618(9) 0.32843(6) 0.11446(4) 0.0340(3) Uani 1 1 d . . .
Se1 Se 0.31874(8) -0.07620(4) 0.06661(4) 0.0341(2) Uani 1 1 d . . .
Se1A Se 0.86591(7) 0.34474(5) 0.20047(3) 0.0314(2) Uani 1 1 d . . .
N1 N 0.1788(7) 0.0554(4) 0.0185(3) 0.0343(15) Uani 1 1 d . . .
N1A N 0.5918(6) 0.3324(3) 0.2152(3) 0.0271(13) Uani 1 1 d . . .
N2 N 0.0921(7) 0.0092(4) 0.0930(3) 0.0392(17) Uani 1 1 d . . .
N2A N 0.6192(7) 0.3976(4) 0.1375(3) 0.0339(15) Uani 1 1 d . . .
N3 N 0.5947(6) 0.0681(3) 0.1268(3) 0.0279(13) Uani 1 1 d . . .
N3A N 1.1426(6) 0.2648(4) 0.1254(3) 0.0297(14) Uani 1 1 d . . .
N7 N 0.6811(6) 0.0839(3) 0.1758(3) 0.0256(13) Uani 1 1 d . . .
N7A N 1.2162(6) 0.2711(3) 0.0793(3) 0.0252(13) Uani 1 1 d . . .
N5 N 0.6358(6) -0.0805(3) 0.1787(3) 0.0290(13) Uani 1 1 d . . .
N5A N 1.0833(7) 0.4201(4) 0.0826(3) 0.0358(15) Uani 1 1 d . . .
N6 N 0.7158(6) -0.0384(3) 0.2186(3) 0.0265(13) Uani 1 1 d . . .
N6A N 1.1722(6) 0.3971(3) 0.0453(3) 0.0278(13) Uani 1 1 d . . .
N4 N 0.4453(6) 0.0201(3) 0.2249(3) 0.0280(13) Uani 1 1 d . . .
N4A N 0.9408(6) 0.2912(4) 0.0259(3) 0.0303(14) Uani 1 1 d . . .
N8 N 0.5599(6) 0.0458(3) 0.2547(3) 0.0266(13) Uani 1 1 d . . .
N8A N 1.0524(6) 0.2947(3) -0.0030(3) 0.0255(13) Uani 1 1 d . . .
C1 C 0.1918(7) 0.0012(4) 0.0593(3) 0.0267(15) Uani 1 1 d . . .
C1A C 0.6850(7) 0.3581(4) 0.1820(3) 0.0276(15) Uani 1 1 d . . .
C2 C 0.2658(11) 0.0669(5) -0.0285(4) 0.056(3) Uani 1 1 d . . .
H2A H 0.3105 0.0206 -0.0354 0.084 Uiso 1 1 calc R . .
H2B H 0.3298 0.1052 -0.0162 0.084 Uiso 1 1 calc R . .
H2C H 0.2139 0.0824 -0.0646 0.084 Uiso 1 1 calc R . .
C2A C 0.6179(9) 0.2885(5) 0.2706(4) 0.0397(19) Uani 1 1 d . . .
H2AA H 0.7010 0.2629 0.2711 0.060 Uiso 1 1 calc R . .
H2AB H 0.5486 0.2522 0.2727 0.060 Uiso 1 1 calc R . .
H2AC H 0.6209 0.3218 0.3042 0.060 Uiso 1 1 calc R . .
C3 C 0.0674(9) 0.0984(5) 0.0253(5) 0.051(3) Uani 1 1 d . . .
H3A H 0.0354 0.1390 0.0019 0.061 Uiso 1 1 calc R . .
C3A C 0.4680(7) 0.3564(5) 0.1909(4) 0.0376(19) Uani 1 1 d . . .
H3AA H 0.3877 0.3463 0.2053 0.045 Uiso 1 1 calc R . .
C4 C 0.0158(9) 0.0699(6) 0.0719(5) 0.052(3) Uani 1 1 d . . .
H4A H -0.0589 0.0878 0.0876 0.063 Uiso 1 1 calc R . .
C4A C 0.4862(8) 0.3968(5) 0.1427(4) 0.040(2) Uani 1 1 d . . .
H4AA H 0.4205 0.4202 0.1172 0.048 Uiso 1 1 calc R . .
C5 C 0.0661(13) -0.0396(6) 0.1421(4) 0.064(3) Uani 1 1 d . . .
H5A H 0.0652 -0.0912 0.1293 0.096 Uiso 1 1 calc R . .
H5B H -0.0182 -0.0270 0.1547 0.096 Uiso 1 1 calc R . .
H5C H 0.1341 -0.0327 0.1748 0.096 Uiso 1 1 calc R . .
C5A C 0.6814(10) 0.4383(5) 0.0911(4) 0.046(2) Uani 1 1 d . . .
H5AA H 0.7626 0.4608 0.1085 0.069 Uiso 1 1 calc R . .
H5AB H 0.6226 0.4770 0.0743 0.069 Uiso 1 1 calc R . .
H5AC H 0.6996 0.4037 0.0604 0.069 Uiso 1 1 calc R . .
C6 C 0.3536(8) 0.0430(4) 0.2583(4) 0.0333(17) Uani 1 1 d . . .
H6A H 0.2639 0.0326 0.2494 0.040 Uiso 1 1 calc R . .
C6A C 1.0984(9) 0.4949(4) 0.0854(4) 0.041(2) Uani 1 1 d . . .
H6AA H 1.0500 0.5270 0.1072 0.049 Uiso 1 1 calc R . .
C7 C 0.4063(8) 0.0844(5) 0.3082(4) 0.0362(18) Uani 1 1 d . . .
H7A H 0.3610 0.1062 0.3374 0.043 Uiso 1 1 calc R . .
C7A C 1.1959(11) 0.5181(5) 0.0514(4) 0.047(2) Uani 1 1 d . . .
H7AA H 1.2252 0.5672 0.0471 0.057 Uiso 1 1 calc R . .
C8 C 0.5382(8) 0.0855(4) 0.3044(3) 0.0328(17) Uani 1 1 d . . .
H8A H 0.6022 0.1090 0.3307 0.039 Uiso 1 1 calc R . .
C8A C 1.2405(9) 0.4553(5) 0.0256(4) 0.0380(19) Uani 1 1 d . . .
H8AA H 1.3051 0.4529 -0.0004 0.046 Uiso 1 1 calc R . .
C9 C 0.6994(7) -0.1470(4) 0.1781(3) 0.0289(16) Uani 1 1 d . . .
H9A H 0.6682 -0.1880 0.1550 0.035 Uiso 1 1 calc R . .
C9A C 0.8462(8) 0.2699(5) -0.0173(4) 0.0363(18) Uani 1 1 d . . .
H9AA H 0.7583 0.2610 -0.0117 0.044 Uiso 1 1 calc R . .
C10 C 0.8179(7) -0.1473(4) 0.2160(4) 0.0323(17) Uani 1 1 d . . .
H10A H 0.8785 -0.1864 0.2226 0.039 Uiso 1 1 calc R . .
C10A C 0.8979(9) 0.2630(5) -0.0716(4) 0.042(2) Uani 1 1 d . . .
H10B H 0.8513 0.2496 -0.1078 0.051 Uiso 1 1 calc R . .
C11 C 0.8248(7) -0.0765(4) 0.2416(3) 0.0304(16) Uani 1 1 d . . .
H11A H 0.8917 -0.0584 0.2694 0.036 Uiso 1 1 calc R . .
C11A C 1.0281(8) 0.2795(4) -0.0620(3) 0.0339(17) Uani 1 1 d . . .
H11B H 1.0884 0.2801 -0.0900 0.041 Uiso 1 1 calc R . .
C12 C 0.6128(8) 0.1218(4) 0.0884(4) 0.0328(17) Uani 1 1 d . . .
H12A H 0.5684 0.1247 0.0502 0.039 Uiso 1 1 calc R . .
C12A C 1.2008(8) 0.2120(4) 0.1606(3) 0.0306(16) Uani 1 1 d . . .
H12B H 1.1709 0.1954 0.1958 0.037 Uiso 1 1 calc R . .
C13 C 0.7067(8) 0.1739(4) 0.1122(4) 0.0350(18) Uani 1 1 d . . .
H13A H 0.7349 0.2167 0.0935 0.042 Uiso 1 1 calc R . .
C13A C 1.3133(8) 0.1845(5) 0.1377(4) 0.0371(18) Uani 1 1 d . . .
H13B H 1.3709 0.1476 0.1544 0.045 Uiso 1 1 calc R . .
C14 C 0.7484(8) 0.1496(4) 0.1677(4) 0.0316(16) Uani 1 1 d . . .
H14A H 0.8105 0.1727 0.1952 0.038 Uiso 1 1 calc R . .
C14A C 1.3215(8) 0.2226(4) 0.0863(4) 0.0325(17) Uani 1 1 d . . .
H14B H 1.3862 0.2169 0.0606 0.039 Uiso 1 1 calc R . .
C15 C 0.6832(7) 0.0396(4) 0.2294(3) 0.0256(15) Uani 1 1 d . . .
H15A H 0.7529 0.0600 0.2585 0.031 Uiso 1 1 calc R . .
C15A C 1.1777(7) 0.3192(4) 0.0284(3) 0.0263(15) Uani 1 1 d . . .
H15B H 1.2453 0.3144 0.0009 0.032 Uiso 1 1 calc R . .
B1 B 0.4803(10) 0.2021(6) 0.4469(5) 0.042(2) Uani 1 1 d . . .
B1A B 0.0209(8) 0.1210(5) 0.2957(4) 0.0288(18) Uani 1 1 d . . .
F1 F 0.5324(7) 0.2364(6) 0.4975(4) 0.119(4) Uani 1 1 d . . .
F1A F 0.0744(7) 0.1902(3) 0.2921(3) 0.075(2) Uani 1 1 d . . .
F2 F 0.3550(6) 0.2220(6) 0.4303(3) 0.098(3) Uani 1 1 d . . .
F2A F -0.1063(4) 0.1256(3) 0.3119(2) 0.0431(12) Uani 1 1 d . . .
F3 F 0.4763(11) 0.1263(5) 0.4608(5) 0.126(4) Uani 1 1 d . . .
F3A F 0.0990(6) 0.0817(4) 0.3393(3) 0.078(2) Uani 1 1 d . . .
F4 F 0.5578(6) 0.2105(4) 0.4028(2) 0.0639(17) Uani 1 1 d . . .
F4A F 0.0162(6) 0.0841(4) 0.2426(3) 0.076(2) Uani 1 1 d . . .

loop_
_atom_site_aniso_label
_atom_site_aniso_U_11
_atom_site_aniso_U_22
_atom_site_aniso_U_33
_atom_site_aniso_U_23
_atom_site_aniso_U_13
_atom_site_aniso_U_12
Cu1 0.0290(5) 0.0296(5) 0.0342(5) -0.0051(4) -0.0062(4) 0.0009(4)
Cu1A 0.0283(5) 0.0368(5) 0.0387(6) -0.0028(4) 0.0122(4) 0.0022(4)
Se1 0.0351(4) 0.0322(4) 0.0328(4) -0.0107(3) -0.0056(3) 0.0051(3)
Se1A 0.0231(4) 0.0397(5) 0.0316(4) -0.0042(3) 0.0043(3) -0.0001(3)
N1 0.038(4) 0.027(3) 0.037(4) -0.005(3) -0.003(3) 0.001(3)
N1A 0.026(3) 0.019(3) 0.037(3) -0.003(3) 0.008(3) -0.001(2)
N2 0.033(4) 0.037(4) 0.049(4) -0.019(3) 0.011(3) -0.002(3)
N2A 0.036(4) 0.033(3) 0.032(4) 0.000(3) 0.002(3) 0.002(3)
N3 0.032(3) 0.024(3) 0.028(3) -0.001(3) 0.003(3) 0.002(3)
N3A 0.032(3) 0.030(3) 0.028(3) 0.001(3) 0.010(3) 0.001(3)
N7 0.025(3) 0.022(3) 0.030(3) 0.001(2) 0.002(2) -0.001(2)
N7A 0.028(3) 0.025(3) 0.023(3) 0.003(2) 0.005(2) 0.003(2)
N5 0.031(3) 0.023(3) 0.032(3) -0.006(3) -0.002(3) -0.001(3)
N5A 0.042(4) 0.029(3) 0.038(4) -0.003(3) 0.016(3) -0.001(3)
N6 0.025(3) 0.020(3) 0.034(3) 0.000(2) 0.000(3) 0.003(2)
N6A 0.032(3) 0.023(3) 0.030(3) 0.003(3) 0.012(3) 0.002(3)
N4 0.023(3) 0.028(3) 0.032(3) 0.000(3) 0.001(2) -0.001(2)
N4A 0.028(3) 0.029(3) 0.034(3) -0.001(3) 0.006(3) -0.001(3)
N8 0.025(3) 0.022(3) 0.032(3) 0.000(2) 0.002(2) 0.001(2)
N8A 0.028(3) 0.023(3) 0.025(3) -0.001(2) 0.003(2) 0.002(2)
C1 0.028(4) 0.027(4) 0.023(4) -0.007(3) -0.003(3) -0.005(3)
C1A 0.031(4) 0.024(4) 0.028(4) -0.004(3) 0.006(3) -0.002(3)
C2 0.083(7) 0.039(5) 0.049(6) 0.008(4) 0.021(5) -0.008(5)
C2A 0.050(5) 0.038(5) 0.033(4) 0.006(4) 0.018(4) 0.006(4)
C3 0.045(5) 0.029(4) 0.076(7) -0.015(5) -0.009(5) 0.009(4)
C3A 0.020(4) 0.038(4) 0.055(5) -0.008(4) 0.007(3) -0.003(3)
C4 0.027(4) 0.048(5) 0.082(7) -0.025(5) 0.004(4) 0.006(4)
C4A 0.030(4) 0.045(5) 0.044(5) -0.008(4) -0.007(4) 0.005(4)
C5 0.104(9) 0.051(6) 0.042(6) -0.013(5) 0.032(6) -0.019(6)
C5A 0.056(6) 0.044(5) 0.038(5) 0.019(4) 0.007(4) 0.006(4)
C6 0.028(4) 0.036(4) 0.037(4) 0.000(3) 0.007(3) 0.000(3)
C6A 0.060(6) 0.021(4) 0.041(5) -0.004(3) 0.008(4) 0.002(4)
C7 0.038(4) 0.037(4) 0.037(4) -0.006(3) 0.014(3) 0.006(4)
C7A 0.078(7) 0.022(4) 0.043(5) 0.002(4) 0.013(5) -0.010(4)
C8 0.043(4) 0.027(4) 0.028(4) -0.008(3) 0.005(3) -0.005(3)
C8A 0.044(5) 0.034(4) 0.036(4) 0.012(4) 0.007(4) -0.006(4)
C9 0.033(4) 0.019(3) 0.035(4) -0.001(3) 0.005(3) 0.003(3)
C9A 0.030(4) 0.033(4) 0.044(5) 0.006(4) -0.003(3) -0.006(3)
C10 0.026(4) 0.028(4) 0.044(5) 0.007(3) 0.009(3) 0.012(3)
C10A 0.050(5) 0.036(5) 0.037(5) 0.002(4) -0.010(4) -0.005(4)
C11 0.025(4) 0.031(4) 0.034(4) 0.003(3) -0.003(3) 0.000(3)
C11A 0.048(5) 0.029(4) 0.025(4) -0.002(3) 0.001(3) 0.000(3)
C12 0.038(4) 0.032(4) 0.030(4) 0.003(3) 0.010(3) 0.009(3)
C12A 0.035(4) 0.030(4) 0.028(4) 0.003(3) 0.009(3) 0.002(3)
C13 0.044(5) 0.025(4) 0.037(4) 0.006(3) 0.013(4) 0.000(3)
C13A 0.041(4) 0.032(4) 0.038(4) 0.007(3) 0.007(4) 0.011(4)
C14 0.033(4) 0.024(4) 0.038(4) 0.001(3) 0.008(3) -0.005(3)
C14A 0.030(4) 0.027(4) 0.042(4) -0.001(3) 0.011(3) 0.008(3)
C15 0.025(4) 0.021(3) 0.030(4) -0.003(3) 0.002(3) 0.001(3)
C15A 0.027(4) 0.029(4) 0.023(3) 0.002(3) 0.005(3) 0.001(3)
B1 0.034(5) 0.054(6) 0.037(5) -0.007(5) 0.007(4) -0.012(4)
B1A 0.029(4) 0.021(4) 0.037(5) 0.002(3) 0.005(3) -0.004(3)
F1 0.059(4) 0.219(10) 0.086(5) -0.096(6) 0.031(4) -0.041(5)
F1A 0.096(5) 0.046(3) 0.090(5) 0.001(3) 0.035(4) -0.032(3)
F2 0.046(4) 0.174(8) 0.075(5) 0.059(5) 0.018(3) 0.017(4)
F2A 0.028(2) 0.058(3) 0.043(3) -0.009(2) 0.002(2) -0.002(2)
F3 0.153(9) 0.088(6) 0.141(9) 0.044(6) 0.034(7) 0.002(6)
F3A 0.042(3) 0.112(6) 0.082(5) 0.056(4) 0.015(3) 0.019(3)
F4 0.051(3) 0.097(5) 0.047(3) -0.026(3) 0.022(3) -0.026(3)
F4A 0.060(4) 0.099(5) 0.071(4) -0.047(4) 0.007(3) 0.003(4)

_geom_special_details            
; 
 All esds (except the esd in the dihedral angle between two l.s. planes) 
 are estimated using the full covariance matrix.  The cell esds are taken 
 into account individually in the estimation of esds in distances, angles 
 and torsion angles; correlations between esds in cell parameters are only 
 used when they are defined by crystal symmetry.  An approximate (isotropic) 
 treatment of cell esds is used for estimating esds involving l.s. planes. 
;

loop_
_geom_bond_atom_site_label_1
_geom_bond_atom_site_label_2
_geom_bond_distance
_geom_bond_site_symmetry_2
_geom_bond_publ_flag
Cu1 N5 2.053(6) . ?
Cu1 N4 2.111(6) . ?
Cu1 N3 2.188(6) . ?
Cu1 Se1 2.2941(13) . ?
Cu1A N4A 2.094(7) . ?
Cu1A N3A 2.111(6) . ?
Cu1A N5A 2.184(7) . ?
Cu1A Se1A 2.3120(13) . ?
Se1 C1 1.880(7) . ?
Se1A C1A 1.857(7) . ?
N1 C1 1.327(10) . ?
N1 C3 1.390(11) . ?
N1 C2 1.471(12) . ?
N1A C1A 1.352(9) . ?
N1A C3A 1.384(10) . ?
N1A C2A 1.473(10) . ?
N2 C1 1.344(10) . ?
N2 C4 1.381(12) . ?
N2 C5 1.453(12) . ?
N2A C1A 1.339(10) . ?
N2A C4A 1.371(11) . ?
N2A C5A 1.473(11) . ?
N3 C12 1.315(10) . ?
N3 N7 1.362(8) . ?
N3A C12A 1.325(10) . ?
N3A N7A 1.355(8) . ?
N7 C14 1.374(9) . ?
N7 C15 1.441(9) . ?
N7A C14A 1.370(9) . ?
N7A C15A 1.449(9) . ?
N5 C9 1.345(9) . ?
N5 N6 1.366(8) . ?
N5A C6A 1.336(10) . ?
N5A N6A 1.367(9) . ?
N6 C11 1.351(9) . ?
N6 C15 1.450(9) . ?
N6A C8A 1.347(10) . ?
N6A C15A 1.435(9) . ?
N4 C6 1.327(10) . ?
N4 N8 1.358(8) . ?
N4A C9A 1.346(10) . ?
N4A N8A 1.374(9) . ?
N8 C8 1.364(10) . ?
N8 C15 1.440(9) . ?
N8A C11A 1.355(9) . ?
N8A C15A 1.455(9) . ?
C2 H2A 0.9600 . ?
C2 H2B 0.9600 . ?
C2 H2C 0.9600 . ?
C2A H2AA 0.9600 . ?
C2A H2AB 0.9600 . ?
C2A H2AC 0.9600 . ?
C3 C4 1.328(15) . ?
C3 H3A 0.9300 . ?
C3A C4A 1.332(13) . ?
C3A H3AA 0.9300 . ?
C4 H4A 0.9300 . ?
C4A H4AA 0.9300 . ?
C5 H5A 0.9600 . ?
C5 H5B 0.9600 . ?
C5 H5C 0.9600 . ?
C5A H5AA 0.9600 . ?
C5A H5AB 0.9600 . ?
C5A H5AC 0.9600 . ?
C6 C7 1.401(11) . ?
C6 H6A 0.9300 . ?
C6A C7A 1.383(13) . ?
C6A H6AA 0.9300 . ?
C7 C8 1.355(11) . ?
C7 H7A 0.9300 . ?
C7A C8A 1.359(12) . ?
C7A H7AA 0.9300 . ?
C8 H8A 0.9300 . ?
C8A H8AA 0.9300 . ?
C9 C10 1.399(11) . ?
C9 H9A 0.9300 . ?
C9A C10A 1.392(13) . ?
C9A H9AA 0.9300 . ?
C10 C11 1.380(11) . ?
C10 H10A 0.9300 . ?
C10A C11A 1.349(12) . ?
C10A H10B 0.9300 . ?
C11 H11A 0.9300 . ?
C11A H11B 0.9300 . ?
C12 C13 1.391(11) . ?
C12 H12A 0.9300 . ?
C12A C13A 1.396(11) . ?
C12A H12B 0.9300 . ?
C13 C14 1.349(11) . ?
C13 H13A 0.9300 . ?
C13A C14A 1.354(11) . ?
C13A H13B 0.9300 . ?
C14 H14A 0.9300 . ?
C14A H14B 0.9300 . ?
C15 H15A 0.9800 . ?
C15A H15B 0.9800 . ?
B1 F2 1.335(12) . ?
B1 F4 1.346(11) . ?
B1 F1 1.349(12) . ?
B1 F3 1.382(14) . ?
B1A F1A 1.349(10) . ?
B1A F4A 1.364(11) . ?
B1A F3A 1.382(10) . ?
B1A F2A 1.387(10) . ?

loop_
_geom_angle_atom_site_label_1
_geom_angle_atom_site_label_2
_geom_angle_atom_site_label_3
_geom_angle
_geom_angle_site_symmetry_1
_geom_angle_site_symmetry_3
_geom_angle_publ_flag
N5 Cu1 N4 88.8(2) . . ?
N5 Cu1 N3 86.1(2) . . ?
N4 Cu1 N3 86.6(2) . . ?
N5 Cu1 Se1 125.80(17) . . ?
N4 Cu1 Se1 132.94(17) . . ?
N3 Cu1 Se1 122.35(17) . . ?
N4A Cu1A N3A 87.4(2) . . ?
N4A Cu1A N5A 86.2(3) . . ?
N3A Cu1A N5A 87.0(3) . . ?
N4A Cu1A Se1A 145.41(18) . . ?
N3A Cu1A Se1A 114.74(17) . . ?
N5A Cu1A Se1A 119.49(18) . . ?
C1 Se1 Cu1 100.4(2) . . ?
C1A Se1A Cu1A 110.3(2) . . ?
C1 N1 C3 109.8(8) . . ?
C1 N1 C2 125.5(7) . . ?
C3 N1 C2 124.7(8) . . ?
C1A N1A C3A 109.9(7) . . ?
C1A N1A C2A 125.4(6) . . ?
C3A N1A C2A 124.6(7) . . ?
C1 N2 C4 108.5(8) . . ?
C1 N2 C5 125.7(8) . . ?
C4 N2 C5 125.7(8) . . ?
C1A N2A C4A 110.2(7) . . ?
C1A N2A C5A 124.8(7) . . ?
C4A N2A C5A 125.0(7) . . ?
C12 N3 N7 105.1(6) . . ?
C12 N3 Cu1 142.3(6) . . ?
N7 N3 Cu1 112.3(4) . . ?
C12A N3A N7A 105.8(6) . . ?
C12A N3A Cu1A 139.9(5) . . ?
N7A N3A Cu1A 113.7(4) . . ?
N3 N7 C14 110.6(6) . . ?
N3 N7 C15 121.2(6) . . ?
C14 N7 C15 127.8(6) . . ?
N3A N7A C14A 110.7(6) . . ?
N3A N7A C15A 122.4(6) . . ?
C14A N7A C15A 126.8(6) . . ?
C9 N5 N6 103.5(6) . . ?
C9 N5 Cu1 140.8(5) . . ?
N6 N5 Cu1 115.7(4) . . ?
C6A N5A N6A 104.1(7) . . ?
C6A N5A Cu1A 142.0(6) . . ?
N6A N5A Cu1A 113.9(5) . . ?
C11 N6 N5 112.5(6) . . ?
C11 N6 C15 127.2(6) . . ?
N5 N6 C15 120.2(6) . . ?
C8A N6A N5A 112.1(6) . . ?
C8A N6A C15A 127.7(7) . . ?
N5A N6A C15A 120.0(6) . . ?
C6 N4 N8 103.6(6) . . ?
C6 N4 Cu1 141.6(5) . . ?
N8 N4 Cu1 114.2(4) . . ?
C9A N4A N8A 103.3(6) . . ?
C9A N4A Cu1A 141.5(6) . . ?
N8A N4A Cu1A 114.9(4) . . ?
N4 N8 C8 111.8(6) . . ?
N4 N8 C15 121.1(6) . . ?
C8 N8 C15 126.5(6) . . ?
C11A N8A N4A 112.9(6) . . ?
C11A N8A C15A 126.3(6) . . ?
N4A N8A C15A 120.5(6) . . ?
N1 C1 N2 107.2(7) . . ?
N1 C1 Se1 127.1(6) . . ?
N2 C1 Se1 125.6(6) . . ?
N2A C1A N1A 105.6(6) . . ?
N2A C1A Se1A 129.4(6) . . ?
N1A C1A Se1A 124.8(6) . . ?
N1 C2 H2A 109.5 . . ?
N1 C2 H2B 109.5 . . ?
H2A C2 H2B 109.5 . . ?
N1 C2 H2C 109.5 . . ?
H2A C2 H2C 109.5 . . ?
H2B C2 H2C 109.5 . . ?
N1A C2A H2AA 109.5 . . ?
N1A C2A H2AB 109.5 . . ?
H2AA C2A H2AB 109.5 . . ?
N1A C2A H2AC 109.5 . . ?
H2AA C2A H2AC 109.5 . . ?
H2AB C2A H2AC 109.5 . . ?
C4 C3 N1 106.2(8) . . ?
C4 C3 H3A 126.9 . . ?
N1 C3 H3A 126.9 . . ?
C4A C3A N1A 106.5(7) . . ?
C4A C3A H3AA 126.7 . . ?
N1A C3A H3AA 126.7 . . ?
C3 C4 N2 108.3(8) . . ?
C3 C4 H4A 125.9 . . ?
N2 C4 H4A 125.9 . . ?
C3A C4A N2A 107.7(7) . . ?
C3A C4A H4AA 126.1 . . ?
N2A C4A H4AA 126.1 . . ?
N2 C5 H5A 109.5 . . ?
N2 C5 H5B 109.5 . . ?
H5A C5 H5B 109.5 . . ?
N2 C5 H5C 109.5 . . ?
H5A C5 H5C 109.5 . . ?
H5B C5 H5C 109.5 . . ?
N2A C5A H5AA 109.5 . . ?
N2A C5A H5AB 109.5 . . ?
H5AA C5A H5AB 109.5 . . ?
N2A C5A H5AC 109.5 . . ?
H5AA C5A H5AC 109.5 . . ?
H5AB C5A H5AC 109.5 . . ?
N4 C6 C7 112.8(7) . . ?
N4 C6 H6A 123.6 . . ?
C7 C6 H6A 123.6 . . ?
N5A C6A C7A 110.8(8) . . ?
N5A C6A H6AA 124.6 . . ?
C7A C6A H6AA 124.6 . . ?
C8 C7 C6 104.4(7) . . ?
C8 C7 H7A 127.8 . . ?
C6 C7 H7A 127.8 . . ?
C8A C7A C6A 106.8(7) . . ?
C8A C7A H7AA 126.6 . . ?
C6A C7A H7AA 126.6 . . ?
C7 C8 N8 107.4(7) . . ?
C7 C8 H8A 126.3 . . ?
N8 C8 H8A 126.3 . . ?
N6A C8A C7A 106.1(7) . . ?
N6A C8A H8AA 127.0 . . ?
C7A C8A H8AA 127.0 . . ?
N5 C9 C10 112.3(7) . . ?
N5 C9 H9A 123.9 . . ?
C10 C9 H9A 123.9 . . ?
N4A C9A C10A 110.6(7) . . ?
N4A C9A H9AA 124.7 . . ?
C10A C9A H9AA 124.7 . . ?
C11 C10 C9 104.6(6) . . ?
C11 C10 H10A 127.7 . . ?
C9 C10 H10A 127.7 . . ?
C11A C10A C9A 107.5(7) . . ?
C11A C10A H10B 126.2 . . ?
C9A C10A H10B 126.2 . . ?
N6 C11 C10 107.0(7) . . ?
N6 C11 H11A 126.5 . . ?
C10 C11 H11A 126.5 . . ?
C10A C11A N8A 105.5(7) . . ?
C10A C11A H11B 127.2 . . ?
N8A C11A H11B 127.2 . . ?
N3 C12 C13 111.6(7) . . ?
N3 C12 H12A 124.2 . . ?
C13 C12 H12A 124.2 . . ?
N3A C12A C13A 110.7(7) . . ?
N3A C12A H12B 124.7 . . ?
C13A C12A H12B 124.7 . . ?
C14 C13 C12 106.1(7) . . ?
C14 C13 H13A 127.0 . . ?
C12 C13 H13A 127.0 . . ?
C14A C13A C12A 106.1(7) . . ?
C14A C13A H13B 127.0 . . ?
C12A C13A H13B 127.0 . . ?
C13 C14 N7 106.5(7) . . ?
C13 C14 H14A 126.7 . . ?
N7 C14 H14A 126.7 . . ?
C13A C14A N7A 106.8(7) . . ?
C13A C14A H14B 126.6 . . ?
N7A C14A H14B 126.6 . . ?
N8 C15 N7 111.1(6) . . ?
N8 C15 N6 111.5(6) . . ?
N7 C15 N6 111.0(6) . . ?
N8 C15 H15A 107.7 . . ?
N7 C15 H15A 107.7 . . ?
N6 C15 H15A 107.7 . . ?
N6A C15A N7A 111.8(6) . . ?
N6A C15A N8A 111.0(6) . . ?
N7A C15A N8A 110.8(6) . . ?
N6A C15A H15B 107.7 . . ?
N7A C15A H15B 107.7 . . ?
N8A C15A H15B 107.7 . . ?
F2 B1 F4 112.6(9) . . ?
F2 B1 F1 113.0(9) . . ?
F4 B1 F1 111.6(8) . . ?
F2 B1 F3 105.6(9) . . ?
F4 B1 F3 108.1(9) . . ?
F1 B1 F3 105.4(10) . . ?
F1A B1A F4A 110.9(8) . . ?
F1A B1A F3A 107.3(7) . . ?
F4A B1A F3A 110.2(8) . . ?
F1A B1A F2A 110.9(7) . . ?
F4A B1A F2A 108.7(7) . . ?
F3A B1A F2A 108.7(7) . . ?

_diffrn_measured_fraction_theta_max 0.993
_diffrn_reflns_theta_full        25.05
_diffrn_measured_fraction_theta_full 0.993
_refine_diff_density_max         1.490
_refine_diff_density_min         -0.619
_refine_diff_density_rms         0.138

#==========================================================================================
#==========================================================================================

#     END OF CIF

#==========================================================================================
#==========================================================================================

data_[TpmCu(dmit)][BF4]

#==========================================================================================
_publ_section_references         
;
    ENTER OTHER REFERENCES

    Jacobson, R. (1998). <i>REQAB</i>. Version 1.1. Molecular Structure
Corporation, The Woodlands, Texas, USA.

Molecular Structure Corporation & Rigaku (2006). <i>CrystalClear</i> MSC, The
Woodlands, Texas, USA, and Rigaku Corporation, Tokyo, Japan.

Sheldrick, G. M. (2008). <i>SHELXTL</i>.Version 6.10 Acta Cryst. A64, 112-122.
;
_publ_section_exptl_refinement   
;
    ENTER SPECIAL DETAILS OF THE REFINEMENT
;

data_tpmdimt

_audit_creation_method           SHELXL-97
_chemical_name_systematic        ?
_chemical_name_common            ?
_chemical_formula_moiety         'C15 H18 Cu N8 S, B F4'
_chemical_formula_sum            'C15 H18 B Cu F4 N8 S'
_chemical_properties_physical    'air-sensitive, moisture-sensitive'
_chemical_melting_point          471

_exptl_crystal_description       chip
_exptl_crystal_colour            colorless

_diffrn_ambient_temperature      158.2
_chemical_formula_weight         492.78

loop_
_atom_type_symbol
_atom_type_description
_atom_type_scat_dispersion_real
_atom_type_scat_dispersion_imag
_atom_type_scat_source
C C 0.0033 0.0016 'International Tables Vol C Tables 4.2.6.8 and 6.1.1.4'
H H 0.0000 0.0000 'International Tables Vol C Tables 4.2.6.8 and 6.1.1.4'
B B 0.0013 0.0007 'International Tables Vol C Tables 4.2.6.8 and 6.1.1.4'
N N 0.0061 0.0033 'International Tables Vol C Tables 4.2.6.8 and 6.1.1.4'
F F 0.0171 0.0103 'International Tables Vol C Tables 4.2.6.8 and 6.1.1.4'
Cu Cu 0.3201 1.2651 'International Tables Vol C Tables 4.2.6.8 and 6.1.1.4'
S S 0.1246 0.1234 'International Tables Vol C Tables 4.2.6.8 and 6.1.1.4'

_symmetry_cell_setting           orthorhombic
_symmetry_space_group_name_H-M   'P 21 21 21'
_symmetry_int_tables_number      19
_chemical_absolute_configuration ?
_symmetry_space_group_name_Hall  'P 2ac 2ab'

loop_
_symmetry_equiv_pos_as_xyz
'x, y, z'
'-x+1/2, -y, z+1/2'
'-x, y+1/2, -z+1/2'
'x+1/2, -y+1/2, -z'

_cell_length_a                   9.7241(19)
_cell_length_b                   11.335(2)
_cell_length_c                   18.262(4)
_cell_angle_alpha                90.00
_cell_angle_beta                 90.00
_cell_angle_gamma                90.00
_cell_volume                     2012.9(7)
_cell_formula_units_Z            4
_cell_measurement_temperature    158.2
_cell_measurement_reflns_used    16710
_cell_measurement_theta_min      2.76
_cell_measurement_theta_max      26.72
_exptl_crystal_size_max          0.31
_exptl_crystal_size_mid          0.26
_exptl_crystal_size_min          0.17
_exptl_crystal_density_meas      ?
_exptl_crystal_density_diffrn    1.626
_exptl_crystal_density_method    'not measured'
_exptl_crystal_F_000             1000
_exptl_absorpt_coefficient_mu    1.245
_exptl_absorpt_correction_type   multi-scan
_exptl_absorpt_correction_T_min  0.6989
_exptl_absorpt_correction_T_max  0.8162
_exptl_absorpt_process_details   'REQAB, CrystalClear'

_exptl_special_details           
; 
 ? 
;
_diffrn_radiation_probe          x-ray
_diffrn_radiation_type           MoK\a
_diffrn_radiation_wavelength     0.71073
_diffrn_source                   'fine-focus sealed tube'
_diffrn_radiation_monochromator  graphite
_diffrn_measurement_device_type  'Rigaku AFC8S'
_diffrn_measurement_method       dtprofit.ref
_diffrn_detector_area_resol_mean 14.6306
_diffrn_standards_number         0
_diffrn_standards_interval_count 0
_diffrn_standards_interval_time  0
_diffrn_standards_decay_%        0
_diffrn_reflns_number            16710
_diffrn_reflns_av_R_equivalents  0.0250
_diffrn_reflns_av_sigmaI/netI    0.0284
_diffrn_reflns_limit_h_min       -8
_diffrn_reflns_limit_h_max       12
_diffrn_reflns_limit_k_min       -14
_diffrn_reflns_limit_k_max       14
_diffrn_reflns_limit_l_min       -23
_diffrn_reflns_limit_l_max       23
_diffrn_reflns_theta_min         2.76
_diffrn_reflns_theta_max         26.72
_reflns_number_total             4255
_reflns_number_gt                3982
_reflns_threshold_expression     >2sigma(I)

_computing_data_collection       'CrystalClear (Rigaku/MSC,2006)'
_computing_cell_refinement       'CrystalClear (Rigaku/MSC,2006)'
_computing_data_reduction        'CrystalClear (Rigaku/MSC,2006)'
_computing_structure_solution    'SHELXTL 6.10 (Sheldrick,2008)'
_computing_structure_refinement  'SHELXTL 6.10 (Sheldrick,2008)'
_computing_molecular_graphics    'SHELXTL 6.10 (Sheldrick,2008)'
_computing_publication_material  'SHELXTL 6.10 (Sheldrick,2008)'

_refine_special_details          
; 
 Refinement of F^2^ against ALL reflections.  The weighted R-factor wR and 
 goodness of fit S are based on F^2^, conventional R-factors R are based 
 on F, with F set to zero for negative F^2^. The threshold expression of 
 F^2^ > 2sigma(F^2^) is used only for calculating R-factors(gt) etc. and is 
 not relevant to the choice of reflections for refinement.  R-factors based 
 on F^2^ are statistically about twice as large as those based on F, and R- 
 factors based on ALL data will be even larger. 
;

_refine_ls_structure_factor_coef Fsqd
_refine_ls_matrix_type           full
_refine_ls_weighting_scheme      calc
_refine_ls_weighting_details     
'calc w=1/[\s^2^(Fo^2^)+(0.0469P)^2^+0.3386P] where P=(Fo^2^+2Fc^2^)/3'
_atom_sites_solution_primary     direct
_atom_sites_solution_secondary   difmap
_atom_sites_solution_hydrogens   geom
_refine_ls_hydrogen_treatment    constr
_refine_ls_extinction_method     SHELXL
_refine_ls_extinction_coef       0.0037(9)
_refine_ls_extinction_expression Fc^*^=kFc[1+0.001xFc^2^\l^3^/sin(2\q)]^-1/4^
_refine_ls_abs_structure_details 'Flack H D (1983), Acta Cryst. A39, 876-881'
_refine_ls_abs_structure_Flack   -0.003(13)
_refine_ls_number_reflns         4255
_refine_ls_number_parameters     274
_refine_ls_number_restraints     0
_refine_ls_R_factor_all          0.0388
_refine_ls_R_factor_gt           0.0354
_refine_ls_wR_factor_ref         0.0872
_refine_ls_wR_factor_gt          0.0845
_refine_ls_goodness_of_fit_ref   1.137
_refine_ls_restrained_S_all      1.137
_refine_ls_shift/su_max          0.001
_refine_ls_shift/su_mean         0.000

loop_
_atom_site_label
_atom_site_type_symbol
_atom_site_fract_x
_atom_site_fract_y
_atom_site_fract_z
_atom_site_U_iso_or_equiv
_atom_site_adp_type
_atom_site_occupancy
_atom_site_symmetry_multiplicity
_atom_site_calc_flag
_atom_site_refinement_flags
_atom_site_disorder_assembly
_atom_site_disorder_group
Cu Cu 0.75266(3) 0.73154(3) 0.825658(19) 0.03100(12) Uani 1 1 d . . .
S S 0.62740(6) 0.89330(5) 0.82295(4) 0.02685(15) Uani 1 1 d . . .
N1 N 0.3489(2) 0.8919(2) 0.84477(13) 0.0294(5) Uani 1 1 d . . .
N2 N 0.4126(3) 0.7745(2) 0.75775(13) 0.0308(5) Uani 1 1 d . . .
N3 N 0.9067(2) 0.7392(2) 0.90834(13) 0.0274(5) Uani 1 1 d . . .
N7 N 0.9901(2) 0.64345(19) 0.91050(12) 0.0233(4) Uani 1 1 d . . .
N5 N 0.9023(3) 0.6566(2) 0.75552(13) 0.0284(5) Uani 1 1 d . . .
N6 N 0.9782(2) 0.5694(2) 0.78780(12) 0.0252(5) Uani 1 1 d . . .
N4 N 0.7107(2) 0.5554(2) 0.85771(14) 0.0282(5) Uani 1 1 d . . .
N8 N 0.8259(3) 0.4952(2) 0.87877(13) 0.0254(5) Uani 1 1 d . . .
C1 C 0.4608(3) 0.8504(2) 0.80876(14) 0.0244(5) Uani 1 1 d . . .
C2 C 0.3509(4) 0.9743(3) 0.90601(19) 0.0404(7) Uani 1 1 d . . .
H2A H 0.4444 0.9922 0.9187 0.061 Uiso 1 1 calc R . .
H2B H 0.3055 0.9395 0.9474 0.061 Uiso 1 1 calc R . .
H2C H 0.3042 1.0456 0.8923 0.061 Uiso 1 1 calc R . .
C3 C 0.2323(3) 0.8414(3) 0.81603(18) 0.0402(7) Uani 1 1 d . . .
H3A H 0.1426 0.8552 0.8314 0.048 Uiso 1 1 calc R . .
C4 C 0.2708(3) 0.7688(3) 0.76191(18) 0.0404(7) Uani 1 1 d . . .
H4A H 0.2132 0.7233 0.7327 0.049 Uiso 1 1 calc R . .
C5 C 0.4993(4) 0.7100(3) 0.70558(18) 0.0404(8) Uani 1 1 d . . .
H5A H 0.5592 0.7644 0.6809 0.061 Uiso 1 1 calc R . .
H5B H 0.4421 0.6709 0.6703 0.061 Uiso 1 1 calc R . .
H5C H 0.5533 0.6526 0.7314 0.061 Uiso 1 1 calc R . .
C6 C 0.9558(3) 0.8112(2) 0.95927(15) 0.0292(6) Uani 1 1 d . . .
H6A H 0.9181 0.8844 0.9706 0.035 Uiso 1 1 calc R . .
C7 C 1.0707(3) 0.7633(3) 0.99368(16) 0.0355(6) Uani 1 1 d . . .
H7A H 1.1232 0.7975 1.0306 0.043 Uiso 1 1 calc R . .
C8 C 1.0902(3) 0.6548(3) 0.96158(15) 0.0307(6) Uani 1 1 d . . .
H8A H 1.1584 0.6003 0.9727 0.037 Uiso 1 1 calc R . .
C9 C 0.9417(3) 0.6546(3) 0.68561(15) 0.0302(6) Uani 1 1 d . . .
H9A H 0.9066 0.7043 0.6496 0.036 Uiso 1 1 calc R . .
C10 C 1.0419(3) 0.5688(3) 0.67292(16) 0.0323(6) Uani 1 1 d . . .
H10A H 1.0845 0.5510 0.6287 0.039 Uiso 1 1 calc R . .
C11 C 1.0643(3) 0.5164(2) 0.73960(16) 0.0293(6) Uani 1 1 d . . .
H11A H 1.1264 0.4562 0.7498 0.035 Uiso 1 1 calc R . .
C12 C 0.6065(3) 0.4925(3) 0.88382(17) 0.0332(6) Uani 1 1 d . . .
H12A H 0.5144 0.5115 0.8769 0.040 Uiso 1 1 calc R . .
C13 C 0.6529(3) 0.3935(3) 0.92321(17) 0.0360(7) Uani 1 1 d . . .
H13A H 0.5995 0.3373 0.9471 0.043 Uiso 1 1 calc R . .
C14 C 0.7942(3) 0.3977(3) 0.91879(15) 0.0296(6) Uani 1 1 d . . .
H14A H 0.8558 0.3442 0.9392 0.035 Uiso 1 1 calc R . .
C15 C 0.9622(3) 0.5416(2) 0.86458(14) 0.0228(5) Uani 1 1 d . . .
H15B H 1.0291 0.4802 0.8770 0.027 Uiso 1 1 calc R . .
F1 F 0.2609(3) 0.42967(19) 0.88548(11) 0.0543(6) Uani 1 1 d . . .
F2 F 0.1143(2) 0.3507(2) 0.96549(12) 0.0517(5) Uani 1 1 d . . .
B1 B 0.2526(4) 0.3646(2) 0.94988(16) 0.0281(6) Uani 1 1 d . . .
F4 F 0.3146(2) 0.25682(17) 0.94077(11) 0.0486(5) Uani 1 1 d . . .
F3 F 0.3160(3) 0.4260(2) 1.00488(14) 0.0643(7) Uani 1 1 d . . .

loop_
_atom_site_aniso_label
_atom_site_aniso_U_11
_atom_site_aniso_U_22
_atom_site_aniso_U_33
_atom_site_aniso_U_23
_atom_site_aniso_U_13
_atom_site_aniso_U_12
Cu 0.02279(18) 0.03154(18) 0.03869(19) 0.00398(14) -0.00123(16) 0.00701(15)
S 0.0171(3) 0.0237(3) 0.0397(4) 0.0007(3) -0.0011(3) 0.0012(2)
N1 0.0220(12) 0.0325(11) 0.0336(12) 0.0030(10) 0.0034(9) 0.0038(10)
N2 0.0302(13) 0.0299(11) 0.0323(12) -0.0012(10) -0.0019(10) -0.0012(11)
N3 0.0255(11) 0.0241(10) 0.0325(11) -0.0054(10) -0.0034(9) 0.0040(10)
N7 0.0231(11) 0.0233(10) 0.0235(10) -0.0020(9) -0.0038(9) 0.0026(9)
N5 0.0244(12) 0.0346(11) 0.0263(11) 0.0040(10) 0.0010(9) 0.0073(10)
N6 0.0215(11) 0.0297(11) 0.0244(11) -0.0009(9) 0.0022(9) 0.0056(9)
N4 0.0200(12) 0.0267(11) 0.0378(12) 0.0003(10) -0.0003(9) -0.0005(9)
N8 0.0246(12) 0.0241(10) 0.0273(11) 0.0011(9) -0.0004(9) 0.0014(9)
C1 0.0242(13) 0.0209(11) 0.0282(13) 0.0033(10) 0.0024(10) 0.0036(10)
C2 0.0390(19) 0.0403(16) 0.0419(17) -0.0077(14) 0.0060(15) 0.0109(15)
C3 0.0219(14) 0.0523(17) 0.0465(17) 0.0081(15) 0.0006(14) -0.0022(13)
C4 0.0311(16) 0.0453(16) 0.0449(16) 0.0046(14) -0.0090(13) -0.0127(15)
C5 0.049(2) 0.0380(16) 0.0339(15) -0.0084(13) -0.0024(14) 0.0076(15)
C6 0.0331(15) 0.0253(12) 0.0291(13) -0.0017(11) 0.0001(12) 0.0004(12)
C7 0.0436(17) 0.0297(13) 0.0332(14) -0.0038(12) -0.0087(13) -0.0021(14)
C8 0.0306(15) 0.0289(13) 0.0327(14) -0.0003(11) -0.0103(11) 0.0019(12)
C9 0.0301(14) 0.0366(14) 0.0240(13) 0.0034(11) 0.0005(11) -0.0062(12)
C10 0.0340(15) 0.0371(14) 0.0257(12) -0.0076(13) 0.0044(13) -0.0059(12)
C11 0.0264(14) 0.0295(12) 0.0321(14) -0.0065(11) 0.0059(12) 0.0036(12)
C12 0.0249(15) 0.0332(14) 0.0417(16) -0.0041(12) 0.0027(12) -0.0038(12)
C13 0.0381(17) 0.0349(14) 0.0352(15) 0.0011(12) 0.0026(13) -0.0083(14)
C14 0.0357(16) 0.0245(12) 0.0284(13) 0.0046(11) -0.0013(11) -0.0023(12)
C15 0.0199(12) 0.0255(12) 0.0231(12) -0.0011(10) -0.0026(10) 0.0048(10)
F1 0.0519(13) 0.0641(13) 0.0469(11) 0.0264(9) 0.0099(10) 0.0197(12)
F2 0.0282(10) 0.0564(12) 0.0704(14) 0.0216(11) 0.0044(9) 0.0033(9)
B1 0.0258(14) 0.0262(13) 0.0324(14) -0.0002(11) -0.0041(13) 0.0031(14)
F4 0.0587(13) 0.0337(9) 0.0535(11) -0.0001(9) 0.0071(10) 0.0149(9)
F3 0.0687(16) 0.0626(14) 0.0615(14) -0.0229(12) -0.0279(13) -0.0028(12)

_geom_special_details            
; 
 All esds (except the esd in the dihedral angle between two l.s. planes) 
 are estimated using the full covariance matrix.  The cell esds are taken 
 into account individually in the estimation of esds in distances, angles 
 and torsion angles; correlations between esds in cell parameters are only 
 used when they are defined by crystal symmetry.  An approximate (isotropic) 
 treatment of cell esds is used for estimating esds involving l.s. planes. 
;

loop_
_geom_bond_atom_site_label_1
_geom_bond_atom_site_label_2
_geom_bond_distance
_geom_bond_site_symmetry_2
_geom_bond_publ_flag
Cu N5 2.117(2) . ?
Cu N4 2.121(2) . ?
Cu N3 2.128(2) . ?
Cu S 2.2018(8) . ?
S C1 1.711(3) . ?
N1 C1 1.356(3) . ?
N1 C3 1.374(4) . ?
N1 C2 1.458(4) . ?
N2 C1 1.352(4) . ?
N2 C4 1.382(4) . ?
N2 C5 1.467(4) . ?
N3 C6 1.326(4) . ?
N3 N7 1.355(3) . ?
N7 C8 1.354(3) . ?
N7 C15 1.452(3) . ?
N5 C9 1.333(4) . ?
N5 N6 1.367(3) . ?
N6 C11 1.355(4) . ?
N6 C15 1.446(3) . ?
N4 C12 1.327(4) . ?
N4 N8 1.367(3) . ?
N8 C14 1.361(4) . ?
N8 C15 1.449(4) . ?
C2 H2A 0.9600 . ?
C2 H2B 0.9600 . ?
C2 H2C 0.9600 . ?
C3 C4 1.339(5) . ?
C3 H3A 0.9300 . ?
C4 H4A 0.9300 . ?
C5 H5A 0.9600 . ?
C5 H5B 0.9600 . ?
C5 H5C 0.9600 . ?
C6 C7 1.392(4) . ?
C6 H6A 0.9300 . ?
C7 C8 1.375(4) . ?
C7 H7A 0.9300 . ?
C8 H8A 0.9300 . ?
C9 C10 1.396(4) . ?
C9 H9A 0.9300 . ?
C10 C11 1.372(4) . ?
C10 H10A 0.9300 . ?
C11 H11A 0.9300 . ?
C12 C13 1.407(4) . ?
C12 H12A 0.9300 . ?
C13 C14 1.377(5) . ?
C13 H13A 0.9300 . ?
C14 H14A 0.9300 . ?
C15 H15B 0.9800 . ?
F1 B1 1.391(3) . ?
F2 B1 1.384(4) . ?
B1 F3 1.369(4) . ?
B1 F4 1.372(3) . ?

loop_
_geom_angle_atom_site_label_1
_geom_angle_atom_site_label_2
_geom_angle_atom_site_label_3
_geom_angle
_geom_angle_site_symmetry_1
_geom_angle_site_symmetry_3
_geom_angle_publ_flag
N5 Cu N4 85.48(10) . . ?
N5 Cu N3 87.82(9) . . ?
N4 Cu N3 88.73(9) . . ?
N5 Cu S 134.51(7) . . ?
N4 Cu S 133.15(7) . . ?
N3 Cu S 111.80(6) . . ?
C1 S Cu 106.88(9) . . ?
C1 N1 C3 109.4(2) . . ?
C1 N1 C2 125.7(3) . . ?
C3 N1 C2 124.9(3) . . ?
C1 N2 C4 109.7(3) . . ?
C1 N2 C5 124.4(3) . . ?
C4 N2 C5 125.8(3) . . ?
C6 N3 N7 104.9(2) . . ?
C6 N3 Cu 140.9(2) . . ?
N7 N3 Cu 114.16(16) . . ?
C8 N7 N3 112.0(2) . . ?
C8 N7 C15 127.4(2) . . ?
N3 N7 C15 120.5(2) . . ?
C9 N5 N6 104.2(2) . . ?
C9 N5 Cu 141.6(2) . . ?
N6 N5 Cu 113.60(16) . . ?
C11 N6 N5 112.0(2) . . ?
C11 N6 C15 126.9(2) . . ?
N5 N6 C15 121.2(2) . . ?
C12 N4 N8 104.9(2) . . ?
C12 N4 Cu 138.8(2) . . ?
N8 N4 Cu 112.93(17) . . ?
C14 N8 N4 111.7(2) . . ?
C14 N8 C15 126.8(2) . . ?
N4 N8 C15 121.2(2) . . ?
N2 C1 N1 106.0(2) . . ?
N2 C1 S 127.9(2) . . ?
N1 C1 S 126.0(2) . . ?
N1 C2 H2A 109.5 . . ?
N1 C2 H2B 109.5 . . ?
H2A C2 H2B 109.5 . . ?
N1 C2 H2C 109.5 . . ?
H2A C2 H2C 109.5 . . ?
H2B C2 H2C 109.5 . . ?
C4 C3 N1 107.9(3) . . ?
C4 C3 H3A 126.1 . . ?
N1 C3 H3A 126.1 . . ?
C3 C4 N2 106.9(3) . . ?
C3 C4 H4A 126.5 . . ?
N2 C4 H4A 126.5 . . ?
N2 C5 H5A 109.5 . . ?
N2 C5 H5B 109.5 . . ?
H5A C5 H5B 109.5 . . ?
N2 C5 H5C 109.5 . . ?
H5A C5 H5C 109.5 . . ?
H5B C5 H5C 109.5 . . ?
N3 C6 C7 111.5(3) . . ?
N3 C6 H6A 124.3 . . ?
C7 C6 H6A 124.3 . . ?
C8 C7 C6 105.5(3) . . ?
C8 C7 H7A 127.3 . . ?
C6 C7 H7A 127.3 . . ?
N7 C8 C7 106.2(3) . . ?
N7 C8 H8A 126.9 . . ?
C7 C8 H8A 126.9 . . ?
N5 C9 C10 111.8(3) . . ?
N5 C9 H9A 124.1 . . ?
C10 C9 H9A 124.1 . . ?
C11 C10 C9 105.3(3) . . ?
C11 C10 H10A 127.3 . . ?
C9 C10 H10A 127.3 . . ?
N6 C11 C10 106.7(3) . . ?
N6 C11 H11A 126.7 . . ?
C10 C11 H11A 126.7 . . ?
N4 C12 C13 111.6(3) . . ?
N4 C12 H12A 124.2 . . ?
C13 C12 H12A 124.2 . . ?
C14 C13 C12 105.2(3) . . ?
C14 C13 H13A 127.4 . . ?
C12 C13 H13A 127.4 . . ?
N8 C14 C13 106.6(3) . . ?
N8 C14 H14A 126.7 . . ?
C13 C14 H14A 126.7 . . ?
N6 C15 N8 110.6(2) . . ?
N6 C15 N7 111.5(2) . . ?
N8 C15 N7 110.9(2) . . ?
N6 C15 H15B 107.9 . . ?
N8 C15 H15B 107.9 . . ?
N7 C15 H15B 107.9 . . ?
F3 B1 F4 110.1(3) . . ?
F3 B1 F2 110.1(3) . . ?
F4 B1 F2 110.6(3) . . ?
F3 B1 F1 108.9(3) . . ?
F4 B1 F1 110.1(3) . . ?
F2 B1 F1 106.9(3) . . ?

_diffrn_measured_fraction_theta_max 0.998
_diffrn_reflns_theta_full        26.72
_diffrn_measured_fraction_theta_full 0.998
_refine_diff_density_max         0.766
_refine_diff_density_min         -0.413
_refine_diff_density_rms         0.062

#========================================================================================
#========================================================================================

#     END OF CIF

#========================================================================================
#========================================================================================
 
data_[TpmiprCu(dmise)][BF4]

#========================================================================================

_publ_section_references         
;
    ENTER OTHER REFERENCES

    Jacobson, R. (1998). <i>REQAB</i>. Version 1.1. Molecular Structure
Corporation, The Woodlands, Texas, USA.

Molecular Structure Corporation & Rigaku (2006). <i>CrystalClear</i> MSC, The
Woodlands, Texas, USA, and Rigaku Corporation, Tokyo, Japan.

Sheldrick, G. M. (2008). <i>SHELXTL</i>.Version 6.10 Acta Cryst. A64, 112-122.
;
_publ_section_exptl_refinement   
;
    ENTER SPECIAL DETAILS OF THE REFINEMENT
;
_audit_creation_method           SHELXL-97
_chemical_name_systematic        ?
_chemical_name_common            ?
_chemical_formula_moiety         "C33 H54 Cu N8 Se, B F4"
_chemical_formula_sum            'C33 H54 B Cu F4 N8 Se'
_chemical_properties_physical    air-sensitive
_exptl_crystal_recrystallization_method 
'vapor diffusion or ether into dichloromethane'
_chemical_melting_point          ?

_exptl_crystal_description       prism
_exptl_crystal_colour            colorless

_diffrn_ambient_temperature      168.15
_chemical_formula_weight         792.15

loop_
_atom_type_symbol
_atom_type_description
_atom_type_scat_dispersion_real
_atom_type_scat_dispersion_imag
_atom_type_scat_source
C C 0.0033 0.0016 'International Tables Vol C Tables 4.2.6.8 and 6.1.1.4'
H H 0.0000 0.0000 'International Tables Vol C Tables 4.2.6.8 and 6.1.1.4'
B B 0.0013 0.0007 'International Tables Vol C Tables 4.2.6.8 and 6.1.1.4'
N N 0.0061 0.0033 'International Tables Vol C Tables 4.2.6.8 and 6.1.1.4'
F F 0.0171 0.0103 'International Tables Vol C Tables 4.2.6.8 and 6.1.1.4'
Cu Cu 0.3201 1.2651 'International Tables Vol C Tables 4.2.6.8 and 6.1.1.4'
Se Se -0.0929 2.2259 'International Tables Vol C Tables 4.2.6.8 and 6.1.1.4'

_symmetry_cell_setting           monoclinic
_symmetry_space_group_name_H-M   'C 2/c'
_symmetry_int_tables_number      15
_chemical_absolute_configuration ?
_symmetry_space_group_name_Hall  '-c 2yc'
loop_
_symmetry_equiv_pos_as_xyz
'x, y, z'
'-x, y, -z+1/2'
'x+1/2, y+1/2, z'
'-x+1/2, y+1/2, -z+1/2'
'-x, -y, -z'
'x, -y, z-1/2'
'-x+1/2, -y+1/2, -z'
'x+1/2, -y+1/2, z-1/2'

_cell_length_a                   23.822(5)
_cell_length_b                   16.733(3)
_cell_length_c                   19.931(4)
_cell_angle_alpha                90.00
_cell_angle_beta                 100.04(3)
_cell_angle_gamma                90.00
_cell_volume                     7823(3)
_cell_formula_units_Z            8
_cell_measurement_temperature    168.15
_cell_measurement_reflns_used    38614
_cell_measurement_theta_min      2.43
_cell_measurement_theta_max      26.32
_exptl_crystal_size_max          0.33
_exptl_crystal_size_mid          0.28
_exptl_crystal_size_min          0.22
_exptl_crystal_density_meas      ?
_exptl_crystal_density_diffrn    1.345
_exptl_crystal_density_method    'not measured'
_exptl_crystal_F_000             3296
_exptl_absorpt_coefficient_mu    1.541
_exptl_absorpt_correction_type   multi-scan
_exptl_absorpt_correction_T_min  0.432
_exptl_absorpt_correction_T_max  0.653
_exptl_absorpt_process_details   'REQAB, CrystalClear'

_exptl_special_details           
; 
 ? 
;
_diffrn_radiation_probe          x-ray
_diffrn_radiation_type           MoK\a
_diffrn_radiation_wavelength     0.71073
_diffrn_source                   'fine-focus sealed tube'
_diffrn_radiation_monochromator  graphite
_diffrn_measurement_device_type  'Rigaku AFC8S'
_diffrn_measurement_method       dtprofit.ref
_diffrn_detector_area_resol_mean 14.6306
_diffrn_standards_number         0
_diffrn_standards_interval_count 0
_diffrn_standards_interval_time  0
_diffrn_standards_decay_%        0
_diffrn_reflns_number            38614
_diffrn_reflns_av_R_equivalents  0.0808
_diffrn_reflns_av_sigmaI/netI    0.0616
_diffrn_reflns_limit_h_min       -29
_diffrn_reflns_limit_h_max       28
_diffrn_reflns_limit_k_min       -20
_diffrn_reflns_limit_k_max       20
_diffrn_reflns_limit_l_min       -21
_diffrn_reflns_limit_l_max       24
_diffrn_reflns_theta_min         2.43
_diffrn_reflns_theta_max         26.32
_reflns_number_total             7938
_reflns_number_gt                5097
_reflns_threshold_expression     >2sigma(I)

_computing_data_collection       'CrystalClear (Rigaku/MSC,2006)'
_computing_cell_refinement       'CrystalClear (Rigaku/MSC,2006)'
_computing_data_reduction        'CrystalClear (Rigaku/MSC,2006)'
_computing_structure_solution    'SHELXTL 6.10 (Sheldrick,2008)'
_computing_structure_refinement  'SHELXTL 6.10 (Sheldrick,2008)'
_computing_molecular_graphics    'SHELXTL 6.10 (Sheldrick,2008)'
_computing_publication_material  'SHELXTL 6.10 (Sheldrick,2008)'

_refine_special_details          
; 
 Refinement of F^2^ against ALL reflections.  The weighted R-factor wR and 
 goodness of fit S are based on F^2^, conventional R-factors R are based 
 on F, with F set to zero for negative F^2^. The threshold expression of 
 F^2^ > 2sigma(F^2^) is used only for calculating R-factors(gt) etc. and is 
 not relevant to the choice of reflections for refinement.  R-factors based 
 on F^2^ are statistically about twice as large as those based on F, and R- 
 factors based on ALL data will be even larger. 
;

_refine_ls_structure_factor_coef Fsqd
_refine_ls_matrix_type           full
_refine_ls_weighting_scheme      calc
_refine_ls_weighting_details     
'calc w=1/[\s^2^(Fo^2^)+(0.0993P)^2^+4.7947P] where P=(Fo^2^+2Fc^2^)/3'
_atom_sites_solution_primary     direct
_atom_sites_solution_secondary   difmap
_atom_sites_solution_hydrogens   geom
_refine_ls_hydrogen_treatment    constr
_refine_ls_extinction_method     none
_refine_ls_extinction_coef       ?
_refine_ls_number_reflns         7938
_refine_ls_number_parameters     447
_refine_ls_number_restraints     0
_refine_ls_R_factor_all          0.1023
_refine_ls_R_factor_gt           0.0628
_refine_ls_wR_factor_ref         0.1968
_refine_ls_wR_factor_gt          0.1619
_refine_ls_goodness_of_fit_ref   1.050
_refine_ls_restrained_S_all      1.050
_refine_ls_shift/su_max          0.002
_refine_ls_shift/su_mean         0.000

loop_
_atom_site_label
_atom_site_type_symbol
_atom_site_fract_x
_atom_site_fract_y
_atom_site_fract_z
_atom_site_U_iso_or_equiv
_atom_site_adp_type
_atom_site_occupancy
_atom_site_symmetry_multiplicity
_atom_site_calc_flag
_atom_site_refinement_flags
_atom_site_disorder_assembly
_atom_site_disorder_group
Cu1 Cu 0.97551(2) 0.20090(3) 0.97275(3) 0.0457(2) Uani 1 1 d . . .
Se1 Se 1.03520(2) 0.09512(3) 1.01049(3) 0.0558(2) Uani 1 1 d . . .
N1 N 1.14929(18) 0.1139(3) 0.9841(2) 0.0501(10) Uani 1 1 d . . .
N2 N 1.13404(17) 0.1919(2) 1.0649(2) 0.0442(9) Uani 1 1 d . . .
N3 N 0.99087(17) 0.3045(2) 0.9233(2) 0.0432(9) Uani 1 1 d . . .
N4 N 0.93000(17) 0.2724(3) 1.0381(2) 0.0457(10) Uani 1 1 d . . .
N5 N 0.89716(16) 0.1992(2) 0.9060(2) 0.0413(9) Uani 1 1 d . . .
N6 N 0.87106(16) 0.2722(2) 0.8925(2) 0.0429(9) Uani 1 1 d . . .
N7 N 0.89439(17) 0.3290(2) 1.0039(2) 0.0441(9) Uani 1 1 d . . .
N8 N 0.94948(17) 0.3628(2) 0.9185(2) 0.0431(9) Uani 1 1 d . . .
C1 C 1.10825(19) 0.1372(3) 1.0190(3) 0.0428(11) Uani 1 1 d . . .
C2 C 1.1396(3) 0.0546(4) 0.9300(4) 0.081(2) Uani 1 1 d . . .
H2A H 1.1014 0.0599 0.9052 0.122 Uiso 1 1 calc R . .
H2B H 1.1447 0.0021 0.9495 0.122 Uiso 1 1 calc R . .
H2C H 1.1662 0.0627 0.8997 0.122 Uiso 1 1 calc R . .
C3 C 1.1999(2) 0.1540(3) 1.0079(3) 0.0552(13) Uani 1 1 d . . .
H3A H 1.2341 0.1485 0.9921 0.066 Uiso 1 1 calc R . .
C4 C 1.1899(2) 0.2021(3) 1.0579(3) 0.0476(12) Uani 1 1 d . . .
H4A H 1.2161 0.2364 1.0834 0.057 Uiso 1 1 calc R . .
C5 C 1.1051(3) 0.2314(4) 1.1144(3) 0.0617(14) Uani 1 1 d . . .
H5A H 1.0692 0.2522 1.0917 0.093 Uiso 1 1 calc R . .
H5B H 1.1284 0.2744 1.1356 0.093 Uiso 1 1 calc R . .
H5C H 1.0987 0.1936 1.1485 0.093 Uiso 1 1 calc R . .
C6 C 1.0827(2) 0.2846(4) 0.8879(3) 0.0599(15) Uani 1 1 d . . .
H6A H 1.0835 0.2398 0.9197 0.072 Uiso 1 1 calc R . .
C7 C 1.0317(2) 0.3337(3) 0.8938(3) 0.0497(12) Uani 1 1 d . . .
C8 C 1.0164(2) 0.4123(3) 0.8681(3) 0.0528(13) Uani 1 1 d . . .
H8A H 1.0380 0.4453 0.8449 0.063 Uiso 1 1 calc R . .
C9 C 0.9641(2) 0.4296(3) 0.8840(3) 0.0456(11) Uani 1 1 d . . .
C10 C 0.9282(2) 0.5036(3) 0.8759(3) 0.0473(11) Uani 1 1 d . . .
H10A H 0.8881 0.4882 0.8625 0.057 Uiso 1 1 calc R . .
C11 C 0.8872(2) 0.0639(3) 0.8575(3) 0.0472(12) Uani 1 1 d . . .
H11A H 0.9111 0.0511 0.9013 0.057 Uiso 1 1 calc R . .
C12 C 0.8680(2) 0.1498(3) 0.8609(3) 0.0420(10) Uani 1 1 d . . .
C13 C 0.8232(2) 0.1898(3) 0.8186(3) 0.0466(11) Uani 1 1 d . . .
H13A H 0.7973 0.1675 0.7834 0.056 Uiso 1 1 calc R . .
C14 C 0.82523(19) 0.2685(3) 0.8395(2) 0.0418(10) Uani 1 1 d . . .
C15 C 0.7905(2) 0.3391(3) 0.8126(3) 0.0474(12) Uani 1 1 d . . .
H15A H 0.7925 0.3782 0.8496 0.057 Uiso 1 1 calc R . .
C16 C 0.9412(2) 0.2047(4) 1.1493(3) 0.0572(14) Uani 1 1 d . . .
H16A H 0.9824 0.2056 1.1501 0.069 Uiso 1 1 calc R . .
C17 C 0.9143(2) 0.2654(3) 1.0985(3) 0.0472(11) Uani 1 1 d . . .
C18 C 0.8685(3) 0.3174(3) 1.1029(3) 0.0582(14) Uani 1 1 d . . .
H18A H 0.8506 0.3244 1.1405 0.070 Uiso 1 1 calc R . .
C19 C 0.8553(2) 0.3554(3) 1.0420(3) 0.0524(13) Uani 1 1 d . . .
C20 C 0.8085(3) 0.4139(4) 1.0170(4) 0.0728(19) Uani 1 1 d . . .
H20A H 0.8194 0.4467 0.9806 0.087 Uiso 1 1 calc R . .
C21 C 0.89419(19) 0.3411(3) 0.9321(3) 0.0418(10) Uani 1 1 d . . .
H21A H 0.8686 0.3862 0.9176 0.050 Uiso 1 1 calc R . .
C22 C 0.9193(3) 0.1203(4) 1.1277(4) 0.0664(16) Uani 1 1 d . . .
H22A H 0.9280 0.1081 1.0836 0.100 Uiso 1 1 calc R . .
H22B H 0.8787 0.1183 1.1258 0.100 Uiso 1 1 calc R . .
H22C H 0.9373 0.0820 1.1603 0.100 Uiso 1 1 calc R . .
C23 C 0.9307(3) 0.2227(6) 1.2211(3) 0.080(2) Uani 1 1 d . . .
H23A H 0.9457 0.2746 1.2349 0.121 Uiso 1 1 calc R . .
H23B H 0.9493 0.1831 1.2521 0.121 Uiso 1 1 calc R . .
H23C H 0.8905 0.2218 1.2216 0.121 Uiso 1 1 calc R . .
C24 C 0.7989(5) 0.4675(5) 1.0753(6) 0.114(3) Uani 1 1 d . . .
H24A H 0.8317 0.5008 1.0888 0.170 Uiso 1 1 calc R . .
H24B H 0.7929 0.4351 1.1132 0.170 Uiso 1 1 calc R . .
H24C H 0.7660 0.5004 1.0609 0.170 Uiso 1 1 calc R . .
C25 C 0.7536(3) 0.3697(5) 0.9901(5) 0.089(2) Uani 1 1 d . . .
H25A H 0.7608 0.3297 0.9581 0.133 Uiso 1 1 calc R . .
H25B H 0.7257 0.4068 0.9679 0.133 Uiso 1 1 calc R . .
H25C H 0.7397 0.3446 1.0273 0.133 Uiso 1 1 calc R . .
C26 C 0.9455(4) 0.5562(4) 0.8199(4) 0.081(2) Uani 1 1 d . . .
H26A H 0.9420 0.5262 0.7784 0.121 Uiso 1 1 calc R . .
H26B H 0.9842 0.5734 0.8335 0.121 Uiso 1 1 calc R . .
H26C H 0.9210 0.6021 0.8128 0.121 Uiso 1 1 calc R . .
C27 C 0.9354(3) 0.5478(3) 0.9432(3) 0.0607(15) Uani 1 1 d . . .
H27A H 0.9291 0.5116 0.9785 0.091 Uiso 1 1 calc R . .
H27B H 0.9084 0.5908 0.9398 0.091 Uiso 1 1 calc R . .
H27C H 0.9734 0.5689 0.9538 0.091 Uiso 1 1 calc R . .
C28 C 0.8139(3) 0.3785(4) 0.7545(3) 0.0608(15) Uani 1 1 d . . .
H28A H 0.8540 0.3881 0.7682 0.091 Uiso 1 1 calc R . .
H28B H 0.7946 0.4284 0.7430 0.091 Uiso 1 1 calc R . .
H28C H 0.8079 0.3440 0.7154 0.091 Uiso 1 1 calc R . .
C29 C 0.7284(2) 0.3160(4) 0.7905(4) 0.075(2) Uani 1 1 d . . .
H29A H 0.7142 0.2930 0.8284 0.113 Uiso 1 1 calc R . .
H29B H 0.7252 0.2777 0.7542 0.113 Uiso 1 1 calc R . .
H29C H 0.7065 0.3627 0.7751 0.113 Uiso 1 1 calc R . .
C30 C 0.9236(5) 0.0544(4) 0.8030(5) 0.109(3) Uani 1 1 d . . .
H30A H 0.9556 0.0900 0.8122 0.163 Uiso 1 1 calc R . .
H30B H 0.9013 0.0667 0.7594 0.163 Uiso 1 1 calc R . .
H30C H 0.9370 0.0002 0.8030 0.163 Uiso 1 1 calc R . .
C31 C 0.8378(3) 0.0064(4) 0.8470(5) 0.084(2) Uani 1 1 d . . .
H31A H 0.8153 0.0143 0.8820 0.126 Uiso 1 1 calc R . .
H31B H 0.8519 -0.0475 0.8491 0.126 Uiso 1 1 calc R . .
H31C H 0.8147 0.0156 0.8032 0.126 Uiso 1 1 calc R . .
C32 C 1.0779(3) 0.2496(4) 0.8172(4) 0.080(2) Uani 1 1 d . . .
H32A H 1.0441 0.2175 0.8073 0.120 Uiso 1 1 calc R . .
H32B H 1.1107 0.2170 0.8150 0.120 Uiso 1 1 calc R . .
H32C H 1.0759 0.2920 0.7845 0.120 Uiso 1 1 calc R . .
C33 C 1.1377(3) 0.3306(5) 0.9083(4) 0.0708(17) Uani 1 1 d . . .
H33A H 1.1391 0.3524 0.9531 0.106 Uiso 1 1 calc R . .
H33B H 1.1393 0.3732 0.8765 0.106 Uiso 1 1 calc R . .
H33C H 1.1694 0.2954 0.9083 0.106 Uiso 1 1 calc R . .
B1 B 0.2292(3) 0.4073(4) 0.1503(4) 0.0590(16) Uani 1 1 d . . .
F1 F 0.1910(2) 0.3884(3) 0.1925(3) 0.1007(14) Uani 1 1 d . . .
F2 F 0.2019(2) 0.4153(4) 0.0846(2) 0.1139(18) Uani 1 1 d . . .
F3 F 0.26741(18) 0.3448(2) 0.1510(2) 0.0814(11) Uani 1 1 d . . .
F4 F 0.2575(3) 0.4746(3) 0.1708(3) 0.129(2) Uani 1 1 d . . .

loop_
_atom_site_aniso_label
_atom_site_aniso_U_11
_atom_site_aniso_U_22
_atom_site_aniso_U_33
_atom_site_aniso_U_23
_atom_site_aniso_U_13
_atom_site_aniso_U_12
Cu1 0.0353(3) 0.0415(3) 0.0585(4) 0.0055(3) 0.0031(3) 0.0046(2)
Se1 0.0360(3) 0.0419(3) 0.0867(4) 0.0127(2) 0.0025(2) 0.00190(19)
N1 0.037(2) 0.048(2) 0.065(3) -0.008(2) 0.0104(19) 0.0052(17)
N2 0.039(2) 0.042(2) 0.052(2) 0.0038(18) 0.0111(18) 0.0006(16)
N3 0.044(2) 0.0322(18) 0.056(3) 0.0028(17) 0.0136(18) 0.0110(15)
N4 0.036(2) 0.055(2) 0.045(2) -0.0016(18) 0.0040(17) 0.0046(17)
N5 0.040(2) 0.0356(19) 0.045(2) 0.0044(16) 0.0009(17) 0.0060(15)
N6 0.0328(19) 0.043(2) 0.050(2) 0.0012(17) -0.0013(16) 0.0055(15)
N7 0.038(2) 0.040(2) 0.056(3) -0.0018(18) 0.0129(18) 0.0047(16)
N8 0.039(2) 0.0387(19) 0.053(2) -0.0001(17) 0.0127(18) 0.0044(15)
C1 0.036(2) 0.036(2) 0.055(3) 0.006(2) 0.004(2) 0.0061(17)
C2 0.060(4) 0.083(5) 0.101(6) -0.039(4) 0.014(4) 0.009(3)
C3 0.035(2) 0.060(3) 0.070(4) 0.002(3) 0.009(2) 0.006(2)
C4 0.032(2) 0.049(3) 0.060(3) -0.001(2) 0.004(2) -0.0029(19)
C5 0.066(4) 0.063(3) 0.061(4) -0.005(3) 0.023(3) -0.002(3)
C6 0.044(3) 0.060(3) 0.081(4) 0.013(3) 0.027(3) 0.012(2)
C7 0.045(3) 0.047(3) 0.061(3) 0.004(2) 0.019(2) 0.008(2)
C8 0.048(3) 0.052(3) 0.063(3) 0.009(2) 0.024(3) 0.009(2)
C9 0.049(3) 0.041(2) 0.049(3) 0.009(2) 0.014(2) 0.009(2)
C10 0.045(3) 0.046(3) 0.052(3) 0.010(2) 0.013(2) 0.010(2)
C11 0.047(3) 0.043(2) 0.050(3) 0.005(2) 0.004(2) 0.007(2)
C12 0.041(2) 0.040(2) 0.044(3) 0.0027(19) 0.007(2) 0.0003(18)
C13 0.042(3) 0.048(3) 0.046(3) 0.002(2) -0.003(2) -0.001(2)
C14 0.033(2) 0.049(2) 0.043(3) 0.005(2) 0.0058(19) 0.0066(19)
C15 0.039(3) 0.051(3) 0.050(3) 0.006(2) 0.004(2) 0.003(2)
C16 0.039(3) 0.090(4) 0.041(3) -0.002(3) 0.006(2) -0.001(3)
C17 0.036(2) 0.059(3) 0.046(3) -0.005(2) 0.006(2) -0.005(2)
C18 0.060(3) 0.056(3) 0.065(4) -0.008(3) 0.030(3) 0.001(3)
C19 0.055(3) 0.038(2) 0.071(4) 0.000(2) 0.030(3) 0.007(2)
C20 0.084(5) 0.052(3) 0.095(5) 0.014(3) 0.049(4) 0.026(3)
C21 0.035(2) 0.036(2) 0.054(3) 0.0035(19) 0.007(2) 0.0050(17)
C22 0.062(4) 0.067(4) 0.071(4) 0.021(3) 0.014(3) 0.002(3)
C23 0.043(3) 0.153(7) 0.045(3) -0.001(4) 0.007(3) 0.005(4)
C24 0.127(8) 0.065(4) 0.161(9) -0.007(5) 0.060(7) 0.039(5)
C25 0.064(4) 0.088(5) 0.119(7) 0.032(4) 0.029(4) 0.028(4)
C26 0.098(5) 0.063(4) 0.093(5) 0.037(4) 0.048(4) 0.026(3)
C27 0.058(3) 0.051(3) 0.071(4) -0.003(3) 0.005(3) 0.010(2)
C28 0.065(4) 0.066(3) 0.054(3) 0.012(3) 0.015(3) 0.020(3)
C29 0.037(3) 0.071(4) 0.112(6) 0.019(4) -0.003(3) 0.009(3)
C30 0.153(9) 0.057(4) 0.137(8) 0.005(4) 0.084(7) 0.033(5)
C31 0.074(4) 0.049(3) 0.123(6) 0.017(4) -0.002(4) -0.004(3)
C32 0.059(4) 0.057(3) 0.132(7) -0.031(4) 0.042(4) -0.007(3)
C33 0.049(3) 0.099(5) 0.065(4) -0.002(3) 0.014(3) 0.015(3)
B1 0.053(4) 0.059(4) 0.063(4) -0.006(3) 0.005(3) 0.006(3)
F1 0.086(3) 0.115(3) 0.109(4) 0.013(3) 0.040(3) 0.012(3)
F2 0.089(3) 0.169(5) 0.077(3) 0.020(3) -0.004(2) 0.045(3)
F3 0.083(3) 0.073(2) 0.084(3) -0.001(2) 0.004(2) 0.029(2)
F4 0.132(4) 0.081(3) 0.185(6) -0.061(3) 0.064(4) -0.026(3)

_geom_special_details            
; 
 All esds (except the esd in the dihedral angle between two l.s. planes) 
 are estimated using the full covariance matrix.  The cell esds are taken 
 into account individually in the estimation of esds in distances, angles 
 and torsion angles; correlations between esds in cell parameters are only 
 used when they are defined by crystal symmetry.  An approximate (isotropic) 
 treatment of cell esds is used for estimating esds involving l.s. planes. 
;

loop_
_geom_bond_atom_site_label_1
_geom_bond_atom_site_label_2
_geom_bond_distance
_geom_bond_site_symmetry_2
_geom_bond_publ_flag
Cu1 N3 2.058(4) . ?
Cu1 N5 2.095(4) . ?
Cu1 N4 2.189(4) . ?
Cu1 Se1 2.3126(8) . ?
Se1 C1 1.858(5) . ?
N1 C1 1.352(7) . ?
N1 C3 1.389(7) . ?
N1 C2 1.454(7) . ?
N2 C1 1.363(6) . ?
N2 C4 1.372(6) . ?
N2 C5 1.456(7) . ?
N3 C7 1.315(7) . ?
N3 N8 1.379(5) . ?
N4 C17 1.327(7) . ?
N4 N7 1.370(5) . ?
N5 C12 1.325(6) . ?
N5 N6 1.376(5) . ?
N6 C14 1.382(6) . ?
N6 C21 1.451(6) . ?
N7 C19 1.373(7) . ?
N7 C21 1.446(7) . ?
N8 C9 1.388(6) . ?
N8 C21 1.437(6) . ?
C2 H2A 0.9600 . ?
C2 H2B 0.9600 . ?
C2 H2C 0.9600 . ?
C3 C4 1.334(8) . ?
C3 H3A 0.9300 . ?
C4 H4A 0.9300 . ?
C5 H5A 0.9600 . ?
C5 H5B 0.9600 . ?
C5 H5C 0.9600 . ?
C6 C7 1.488(7) . ?
C6 C32 1.511(10) . ?
C6 C33 1.513(9) . ?
C6 H6A 0.9800 . ?
C7 C8 1.435(7) . ?
C8 C9 1.370(7) . ?
C8 H8A 0.9300 . ?
C9 C10 1.497(6) . ?
C10 C27 1.513(8) . ?
C10 C26 1.534(8) . ?
C10 H10A 0.9800 . ?
C11 C31 1.508(8) . ?
C11 C30 1.510(10) . ?
C11 C12 1.513(6) . ?
C11 H11A 0.9800 . ?
C12 C13 1.409(6) . ?
C13 C14 1.378(7) . ?
C13 H13A 0.9300 . ?
C14 C15 1.488(6) . ?
C15 C29 1.518(7) . ?
C15 C28 1.522(8) . ?
C15 H15A 0.9800 . ?
C16 C17 1.498(8) . ?
C16 C23 1.526(9) . ?
C16 C22 1.540(9) . ?
C16 H16A 0.9800 . ?
C17 C18 1.411(7) . ?
C18 C19 1.358(8) . ?
C18 H18A 0.9300 . ?
C19 C20 1.503(8) . ?
C20 C24 1.516(11) . ?
C20 C25 1.517(11) . ?
C20 H20A 0.9800 . ?
C21 H21A 0.9800 . ?
C22 H22A 0.9600 . ?
C22 H22B 0.9600 . ?
C22 H22C 0.9600 . ?
C23 H23A 0.9600 . ?
C23 H23B 0.9600 . ?
C23 H23C 0.9600 . ?
C24 H24A 0.9600 . ?
C24 H24B 0.9600 . ?
C24 H24C 0.9600 . ?
C25 H25A 0.9600 . ?
C25 H25B 0.9600 . ?
C25 H25C 0.9600 . ?
C26 H26A 0.9600 . ?
C26 H26B 0.9600 . ?
C26 H26C 0.9600 . ?
C27 H27A 0.9600 . ?
C27 H27B 0.9600 . ?
C27 H27C 0.9600 . ?
C28 H28A 0.9600 . ?
C28 H28B 0.9600 . ?
C28 H28C 0.9600 . ?
C29 H29A 0.9600 . ?
C29 H29B 0.9600 . ?
C29 H29C 0.9600 . ?
C30 H30A 0.9600 . ?
C30 H30B 0.9600 . ?
C30 H30C 0.9600 . ?
C31 H31A 0.9600 . ?
C31 H31B 0.9600 . ?
C31 H31C 0.9600 . ?
C32 H32A 0.9600 . ?
C32 H32B 0.9600 . ?
C32 H32C 0.9600 . ?
C33 H33A 0.9600 . ?
C33 H33B 0.9600 . ?
C33 H33C 0.9600 . ?
B1 F4 1.339(8) . ?
B1 F2 1.365(8) . ?
B1 F1 1.379(9) . ?
B1 F3 1.385(7) . ?

loop_
_geom_angle_atom_site_label_1
_geom_angle_atom_site_label_2
_geom_angle_atom_site_label_3
_geom_angle
_geom_angle_site_symmetry_1
_geom_angle_site_symmetry_3
_geom_angle_publ_flag
N3 Cu1 N5 85.43(16) . . ?
N3 Cu1 N4 88.44(16) . . ?
N5 Cu1 N4 84.62(15) . . ?
N3 Cu1 Se1 130.52(11) . . ?
N5 Cu1 Se1 128.71(10) . . ?
N4 Cu1 Se1 124.40(11) . . ?
C1 Se1 Cu1 104.62(13) . . ?
C1 N1 C3 110.3(4) . . ?
C1 N1 C2 122.8(5) . . ?
C3 N1 C2 126.9(5) . . ?
C1 N2 C4 110.3(4) . . ?
C1 N2 C5 123.3(4) . . ?
C4 N2 C5 126.5(4) . . ?
C7 N3 N8 106.3(4) . . ?
C7 N3 Cu1 137.3(3) . . ?
N8 N3 Cu1 116.4(3) . . ?
C17 N4 N7 105.2(4) . . ?
C17 N4 Cu1 137.6(4) . . ?
N7 N4 Cu1 114.2(3) . . ?
C12 N5 N6 104.8(3) . . ?
C12 N5 Cu1 138.0(3) . . ?
N6 N5 Cu1 115.7(3) . . ?
N5 N6 C14 112.3(4) . . ?
N5 N6 C21 118.9(3) . . ?
C14 N6 C21 128.8(4) . . ?
N4 N7 C19 111.7(4) . . ?
N4 N7 C21 118.9(4) . . ?
C19 N7 C21 128.1(4) . . ?
N3 N8 C9 111.5(4) . . ?
N3 N8 C21 118.5(4) . . ?
C9 N8 C21 127.9(4) . . ?
N1 C1 N2 104.9(4) . . ?
N1 C1 Se1 126.4(4) . . ?
N2 C1 Se1 128.4(4) . . ?
N1 C2 H2A 109.5 . . ?
N1 C2 H2B 109.5 . . ?
H2A C2 H2B 109.5 . . ?
N1 C2 H2C 109.5 . . ?
H2A C2 H2C 109.5 . . ?
H2B C2 H2C 109.5 . . ?
C4 C3 N1 106.9(5) . . ?
C4 C3 H3A 126.6 . . ?
N1 C3 H3A 126.6 . . ?
C3 C4 N2 107.7(4) . . ?
C3 C4 H4A 126.2 . . ?
N2 C4 H4A 126.2 . . ?
N2 C5 H5A 109.5 . . ?
N2 C5 H5B 109.5 . . ?
H5A C5 H5B 109.5 . . ?
N2 C5 H5C 109.5 . . ?
H5A C5 H5C 109.5 . . ?
H5B C5 H5C 109.5 . . ?
C7 C6 C32 111.0(5) . . ?
C7 C6 C33 112.2(5) . . ?
C32 C6 C33 111.6(5) . . ?
C7 C6 H6A 107.2 . . ?
C32 C6 H6A 107.2 . . ?
C33 C6 H6A 107.2 . . ?
N3 C7 C8 109.8(4) . . ?
N3 C7 C6 120.4(5) . . ?
C8 C7 C6 129.6(5) . . ?
C9 C8 C7 107.2(5) . . ?
C9 C8 H8A 126.4 . . ?
C7 C8 H8A 126.4 . . ?
C8 C9 N8 105.1(4) . . ?
C8 C9 C10 132.5(5) . . ?
N8 C9 C10 122.1(4) . . ?
C9 C10 C27 109.5(4) . . ?
C9 C10 C26 109.4(5) . . ?
C27 C10 C26 111.1(5) . . ?
C9 C10 H10A 108.9 . . ?
C27 C10 H10A 108.9 . . ?
C26 C10 H10A 108.9 . . ?
C31 C11 C30 111.4(7) . . ?
C31 C11 C12 112.2(5) . . ?
C30 C11 C12 110.4(5) . . ?
C31 C11 H11A 107.5 . . ?
C30 C11 H11A 107.5 . . ?
C12 C11 H11A 107.5 . . ?
N5 C12 C13 111.2(4) . . ?
N5 C12 C11 119.8(4) . . ?
C13 C12 C11 128.9(4) . . ?
C14 C13 C12 106.9(4) . . ?
C14 C13 H13A 126.5 . . ?
C12 C13 H13A 126.5 . . ?
C13 C14 N6 104.8(4) . . ?
C13 C14 C15 131.4(4) . . ?
N6 C14 C15 123.7(4) . . ?
C14 C15 C29 110.8(4) . . ?
C14 C15 C28 111.3(4) . . ?
C29 C15 C28 111.0(5) . . ?
C14 C15 H15A 107.9 . . ?
C29 C15 H15A 107.9 . . ?
C28 C15 H15A 107.9 . . ?
C17 C16 C23 112.3(5) . . ?
C17 C16 C22 110.4(4) . . ?
C23 C16 C22 109.9(6) . . ?
C17 C16 H16A 108.0 . . ?
C23 C16 H16A 108.0 . . ?
C22 C16 H16A 108.0 . . ?
N4 C17 C18 110.3(5) . . ?
N4 C17 C16 121.2(5) . . ?
C18 C17 C16 128.4(5) . . ?
C19 C18 C17 107.0(5) . . ?
C19 C18 H18A 126.5 . . ?
C17 C18 H18A 126.5 . . ?
C18 C19 N7 105.7(5) . . ?
C18 C19 C20 130.1(5) . . ?
N7 C19 C20 124.2(5) . . ?
C19 C20 C24 109.4(7) . . ?
C19 C20 C25 110.1(5) . . ?
C24 C20 C25 108.9(7) . . ?
C19 C20 H20A 109.5 . . ?
C24 C20 H20A 109.5 . . ?
C25 C20 H20A 109.5 . . ?
N8 C21 N7 112.2(4) . . ?
N8 C21 N6 111.8(4) . . ?
N7 C21 N6 111.2(4) . . ?
N8 C21 H21A 107.1 . . ?
N7 C21 H21A 107.1 . . ?
N6 C21 H21A 107.1 . . ?
C16 C22 H22A 109.5 . . ?
C16 C22 H22B 109.5 . . ?
H22A C22 H22B 109.5 . . ?
C16 C22 H22C 109.5 . . ?
H22A C22 H22C 109.5 . . ?
H22B C22 H22C 109.5 . . ?
C16 C23 H23A 109.5 . . ?
C16 C23 H23B 109.5 . . ?
H23A C23 H23B 109.5 . . ?
C16 C23 H23C 109.5 . . ?
H23A C23 H23C 109.5 . . ?
H23B C23 H23C 109.5 . . ?
C20 C24 H24A 109.5 . . ?
C20 C24 H24B 109.5 . . ?
H24A C24 H24B 109.5 . . ?
C20 C24 H24C 109.5 . . ?
H24A C24 H24C 109.5 . . ?
H24B C24 H24C 109.5 . . ?
C20 C25 H25A 109.5 . . ?
C20 C25 H25B 109.5 . . ?
H25A C25 H25B 109.5 . . ?
C20 C25 H25C 109.5 . . ?
H25A C25 H25C 109.5 . . ?
H25B C25 H25C 109.5 . . ?
C10 C26 H26A 109.5 . . ?
C10 C26 H26B 109.5 . . ?
H26A C26 H26B 109.5 . . ?
C10 C26 H26C 109.5 . . ?
H26A C26 H26C 109.5 . . ?
H26B C26 H26C 109.5 . . ?
C10 C27 H27A 109.5 . . ?
C10 C27 H27B 109.5 . . ?
H27A C27 H27B 109.5 . . ?
C10 C27 H27C 109.5 . . ?
H27A C27 H27C 109.5 . . ?
H27B C27 H27C 109.5 . . ?
C15 C28 H28A 109.5 . . ?
C15 C28 H28B 109.5 . . ?
H28A C28 H28B 109.5 . . ?
C15 C28 H28C 109.5 . . ?
H28A C28 H28C 109.5 . . ?
H28B C28 H28C 109.5 . . ?
C15 C29 H29A 109.5 . . ?
C15 C29 H29B 109.5 . . ?
H29A C29 H29B 109.5 . . ?
C15 C29 H29C 109.5 . . ?
H29A C29 H29C 109.5 . . ?
H29B C29 H29C 109.5 . . ?
C11 C30 H30A 109.5 . . ?
C11 C30 H30B 109.5 . . ?
H30A C30 H30B 109.5 . . ?
C11 C30 H30C 109.5 . . ?
H30A C30 H30C 109.5 . . ?
H30B C30 H30C 109.5 . . ?
C11 C31 H31A 109.5 . . ?
C11 C31 H31B 109.5 . . ?
H31A C31 H31B 109.5 . . ?
C11 C31 H31C 109.5 . . ?
H31A C31 H31C 109.5 . . ?
H31B C31 H31C 109.5 . . ?
C6 C32 H32A 109.5 . . ?
C6 C32 H32B 109.5 . . ?
H32A C32 H32B 109.5 . . ?
C6 C32 H32C 109.5 . . ?
H32A C32 H32C 109.5 . . ?
H32B C32 H32C 109.5 . . ?
C6 C33 H33A 109.5 . . ?
C6 C33 H33B 109.5 . . ?
H33A C33 H33B 109.5 . . ?
C6 C33 H33C 109.5 . . ?
H33A C33 H33C 109.5 . . ?
H33B C33 H33C 109.5 . . ?
F4 B1 F2 110.0(7) . . ?
F4 B1 F1 111.0(6) . . ?
F2 B1 F1 110.6(6) . . ?
F4 B1 F3 109.7(6) . . ?
F2 B1 F3 106.7(6) . . ?
F1 B1 F3 108.8(6) . . ?

_diffrn_measured_fraction_theta_max 0.997
_diffrn_reflns_theta_full        26.32
_diffrn_measured_fraction_theta_full 0.997
_refine_diff_density_max         0.940
_refine_diff_density_min         -0.598
_refine_diff_density_rms         0.089

#==========================================================================================
#==========================================================================================

#    END OF CIF

#==========================================================================================
#==========================================================================================
 
data_Tp*Cu(dmit)

#==========================================================================================

_publ_section_references         
;
ENTER OTHER REFERENCES

Jacobson, R. (1998). <i>REQAB</i>. Version 1.1. Molecular Structure
Corporation, The Woodlands, Texas, USA.

Molecular Structure Corporation & Rigaku (2006). <i>CrystalClear</i> MSC, The
Woodlands, Texas, USA, and Rigaku Corporation, Tokyo, Japan.

Sheldrick, G. M. (2008). <i>SHELXTL</i>.Version 6.10 Acta Cryst. A64, 112-122.
;
_publ_section_exptl_refinement   
;
ENTER SPECIAL DETAILS OF THE REFINEMENT
;
_audit_creation_method           SHELXL-97
_chemical_name_systematic        ?
_chemical_name_common            ?
_chemical_formula_moiety         'C20 H30 B Cu N8 S'
_chemical_formula_sum            'C20 H30 B Cu N8 S'
_chemical_properties_physical    'air-sensitive, moisture-sensitive'
_chemical_melting_point          ?

_exptl_crystal_description       prism
_exptl_crystal_colour            colorless

_diffrn_ambient_temperature      165.15
_chemical_formula_weight         488.93

loop_
_atom_type_symbol
_atom_type_description
_atom_type_scat_dispersion_real
_atom_type_scat_dispersion_imag
_atom_type_scat_source
C C 0.0033 0.0016 'International Tables Vol C Tables 4.2.6.8 and 6.1.1.4'
H H 0.0000 0.0000 'International Tables Vol C Tables 4.2.6.8 and 6.1.1.4'
B B 0.0013 0.0007 'International Tables Vol C Tables 4.2.6.8 and 6.1.1.4'
N N 0.0061 0.0033 'International Tables Vol C Tables 4.2.6.8 and 6.1.1.4'
S S 0.1246 0.1234 'International Tables Vol C Tables 4.2.6.8 and 6.1.1.4'
Cu Cu 0.3201 1.2651 'International Tables Vol C Tables 4.2.6.8 and 6.1.1.4'

_symmetry_cell_setting           monoclinic
_symmetry_space_group_name_H-M   'P 21/m'
_symmetry_int_tables_number      11
_chemical_absolute_configuration ?
_symmetry_space_group_name_Hall  '-P 2yb'

loop_
_symmetry_equiv_pos_as_xyz
'x, y, z'
'-x, y+1/2, -z'
'-x, -y, -z'
'x, -y-1/2, z'

_cell_length_a                   8.2925(17)
_cell_length_b                   11.808(2)
_cell_length_c                   11.934(2)
_cell_angle_alpha                90.00
_cell_angle_beta                 91.32(3)
_cell_angle_gamma                90.00
_cell_volume                     1168.3(4)
_cell_formula_units_Z            2
_cell_measurement_temperature    165.15
_cell_measurement_reflns_used    5077
_cell_measurement_theta_min      3.02
_cell_measurement_theta_max      26.72
_exptl_crystal_size_max          0.56
_exptl_crystal_size_mid          0.30
_exptl_crystal_size_min          0.26
_exptl_crystal_density_meas      ?
_exptl_crystal_density_diffrn    1.390
_exptl_crystal_density_method    'not measured'
_exptl_crystal_F_000             512
_exptl_absorpt_coefficient_mu    1.048
_exptl_absorpt_correction_type   multi-scan
_exptl_absorpt_correction_T_min  0.5913
_exptl_absorpt_correction_T_max  0.7722
_exptl_absorpt_process_details   'REQAB, CrystalClear'

_exptl_special_details           
; 
 ? 
;
_diffrn_radiation_probe          x-ray
_diffrn_radiation_type           MoK\a
_diffrn_radiation_wavelength     0.71073
_diffrn_source                   'fine-focus sealed tube'
_diffrn_radiation_monochromator  graphite
_diffrn_measurement_device_type  'Rigaku AFC8S'
_diffrn_measurement_method       dtprofit.ref
_diffrn_detector_area_resol_mean 14.6306
_diffrn_standards_number         0
_diffrn_standards_interval_count 0
_diffrn_standards_interval_time  0
_diffrn_standards_decay_%        0
_diffrn_reflns_number            11607
_diffrn_reflns_av_R_equivalents  0.0179
_diffrn_reflns_av_sigmaI/netI    0.0129
_diffrn_reflns_limit_h_min       -10
_diffrn_reflns_limit_h_max       9
_diffrn_reflns_limit_k_min       -14
_diffrn_reflns_limit_k_max       14
_diffrn_reflns_limit_l_min       -14
_diffrn_reflns_limit_l_max       14
_diffrn_reflns_theta_min         3.02
_diffrn_reflns_theta_max         26.74
_reflns_number_total             2586
_reflns_number_gt                2452
_reflns_threshold_expression     >2sigma(I)

_computing_data_collection       'CrystalClear (Rigaku/MSC,2006)'
_computing_cell_refinement       'CrystalClear (Rigaku/MSC,2006)'
_computing_data_reduction        'CrystalClear (Rigaku/MSC,2006)'
_computing_structure_solution    'SHELXTL 6.10 (Sheldrick,2008)'
_computing_structure_refinement  'SHELXTL 6.10 (Sheldrick,2008)'
_computing_molecular_graphics    'SHELXTL 6.10 (Sheldrick,2008)'
_computing_publication_material  'SHELXTL 6.10 (Sheldrick,2008)'

_refine_special_details          
; 
 Refinement of F^2^ against ALL reflections.  The weighted R-factor wR and 
 goodness of fit S are based on F^2^, conventional R-factors R are based 
 on F, with F set to zero for negative F^2^. The threshold expression of 
 F^2^ > 2sigma(F^2^) is used only for calculating R-factors(gt) etc. and is 
 not relevant to the choice of reflections for refinement.  R-factors based 
 on F^2^ are statistically about twice as large as those based on F, and R- 
 factors based on ALL data will be even larger. 
;

_refine_ls_structure_factor_coef Fsqd
_refine_ls_matrix_type           full
_refine_ls_weighting_scheme      calc
_refine_ls_weighting_details     
'calc w=1/[\s^2^(Fo^2^)+(0.0608P)^2^+1.0395P] where P=(Fo^2^+2Fc^2^)/3'
_atom_sites_solution_primary     direct
_atom_sites_solution_secondary   difmap
_atom_sites_solution_hydrogens   geom
_refine_ls_hydrogen_treatment    constr
_refine_ls_extinction_method     none
_refine_ls_extinction_coef       ?
_refine_ls_number_reflns         2586
_refine_ls_number_parameters     155
_refine_ls_number_restraints     0
_refine_ls_R_factor_all          0.0428
_refine_ls_R_factor_gt           0.0408
_refine_ls_wR_factor_ref         0.1094
_refine_ls_wR_factor_gt          0.1062
_refine_ls_goodness_of_fit_ref   1.112
_refine_ls_restrained_S_all      1.112
_refine_ls_shift/su_max          0.013
_refine_ls_shift/su_mean         0.000

loop_
_atom_site_label
_atom_site_type_symbol
_atom_site_fract_x
_atom_site_fract_y
_atom_site_fract_z
_atom_site_U_iso_or_equiv
_atom_site_adp_type
_atom_site_occupancy
_atom_site_symmetry_multiplicity
_atom_site_calc_flag
_atom_site_refinement_flags
_atom_site_disorder_assembly
_atom_site_disorder_group
Cu Cu 0.82967(4) 0.2500 0.86727(3) 0.02270(14) Uani 1 2 d S . .
S S 0.71727(8) 0.2500 1.03418(6) 0.02686(19) Uani 1 2 d S . .
N1 N 0.9471(2) 0.34154(16) 1.17658(15) 0.0261(4) Uani 1 1 d . . .
N3 N 0.7575(2) 0.37415(14) 0.74737(13) 0.0220(3) Uani 1 1 d . . .
N6 N 0.8166(2) 0.35601(14) 0.64226(13) 0.0221(3) Uani 1 1 d . . .
N4 N 1.0608(3) 0.2500 0.8125(2) 0.0212(5) Uani 1 2 d S . .
N5 N 1.0733(3) 0.2500 0.6977(2) 0.0207(5) Uani 1 2 d S . .
B B 0.9213(4) 0.2500 0.6201(3) 0.0219(6) Uani 1 2 d S . .
H0 H 0.9541 0.2500 0.5418 0.026 Uiso 1 2 calc SR . .
C1 C 0.8740(3) 0.2500 1.1295(2) 0.0225(6) Uani 1 2 d S . .
C2 C 0.9096(3) 0.4590(2) 1.1496(2) 0.0370(5) Uani 1 1 d . . .
H2A H 0.8618 0.4631 1.0756 0.055 Uiso 1 1 calc R . .
H2B H 1.0068 0.5031 1.1524 0.055 Uiso 1 1 calc R . .
H2C H 0.8352 0.4882 1.2028 0.055 Uiso 1 1 calc R . .
C3 C 1.0667(3) 0.3070(2) 1.25134(18) 0.0308(5) Uani 1 1 d . . .
H3 H 1.1345 0.3538 1.2938 0.037 Uiso 1 1 calc R . .
C6 C 0.6531(2) 0.45958(17) 0.73828(17) 0.0228(4) Uani 1 1 d . . .
C7 C 0.5671(3) 0.5021(2) 0.8384(2) 0.0326(5) Uani 1 1 d . . .
H7A H 0.6287 0.4840 0.9051 0.049 Uiso 1 1 calc R . .
H7B H 0.4629 0.4670 0.8415 0.049 Uiso 1 1 calc R . .
H7C H 0.5543 0.5827 0.8329 0.049 Uiso 1 1 calc R . .
C8 C 0.6433(3) 0.49699(18) 0.62647(18) 0.0258(4) Uani 1 1 d . . .
H8A H 0.5792 0.5553 0.5978 0.031 Uiso 1 1 calc R . .
C9 C 0.7479(2) 0.42981(18) 0.56802(17) 0.0243(4) Uani 1 1 d . . .
C10 C 0.7868(3) 0.4316(2) 0.44683(19) 0.0324(5) Uiso 1 1 d . . .
H10A H 0.8998 0.4462 0.4388 0.049 Uiso 1 1 calc R . .
H10B H 0.7254 0.4900 0.4097 0.049 Uiso 1 1 calc R . .
H10C H 0.7604 0.3596 0.4138 0.049 Uiso 1 1 calc R . .
C12 C 1.2114(3) 0.2500 0.8550(3) 0.0229(6) Uani 1 2 d S . .
C11 C 1.2417(4) 0.2500 0.9787(3) 0.0347(7) Uani 1 2 d S . .
H11A H 1.1405 0.2500 1.0162 0.052 Uiso 1 2 calc SR . .
H11B H 1.3020 0.3164 0.9997 0.052 Uiso 0.50 1 calc PR . .
H11C H 1.3020 0.1836 0.9997 0.052 Uiso 0.50 1 calc PR . .
C13 C 1.3219(4) 0.2500 0.7685(3) 0.0271(6) Uani 1 2 d S . .
H13A H 1.4338 0.2500 0.7757 0.033 Uiso 1 2 calc SR . .
C14 C 1.2308(3) 0.2500 0.6700(3) 0.0242(6) Uani 1 2 d S . .
C15 C 1.2868(4) 0.2500 0.5527(3) 0.0320(7) Uani 1 2 d S . .
H15A H 1.1952 0.2500 0.5020 0.048 Uiso 1 2 calc SR . .
H15B H 1.3508 0.1836 0.5401 0.048 Uiso 0.50 1 calc PR . .
H15C H 1.3508 0.3164 0.5401 0.048 Uiso 0.50 1 calc PR . .

loop_
_atom_site_aniso_label
_atom_site_aniso_U_11
_atom_site_aniso_U_22
_atom_site_aniso_U_33
_atom_site_aniso_U_23
_atom_site_aniso_U_13
_atom_site_aniso_U_12
Cu 0.0207(2) 0.0286(2) 0.0189(2) 0.000 0.00190(13) 0.000
S 0.0183(3) 0.0427(4) 0.0197(3) 0.000 0.0009(3) 0.000
N1 0.0259(9) 0.0280(9) 0.0243(8) -0.0012(7) 0.0008(7) -0.0026(7)
N3 0.0225(8) 0.0239(8) 0.0198(8) 0.0001(6) 0.0023(6) 0.0015(7)
N6 0.0229(8) 0.0251(8) 0.0185(8) 0.0023(6) 0.0015(6) 0.0012(6)
N4 0.0200(11) 0.0238(11) 0.0198(11) 0.000 0.0018(9) 0.000
N5 0.0190(11) 0.0218(11) 0.0215(11) 0.000 0.0043(9) 0.000
B 0.0240(15) 0.0252(15) 0.0167(14) 0.000 0.0031(11) 0.000
C1 0.0201(13) 0.0290(14) 0.0185(13) 0.000 0.0038(10) 0.000
C2 0.0403(13) 0.0290(11) 0.0417(13) 0.0022(10) 0.0022(10) -0.0029(10)
C3 0.0237(10) 0.0444(12) 0.0240(10) -0.0033(9) -0.0030(8) -0.0045(9)
C6 0.0195(9) 0.0221(9) 0.0268(10) -0.0010(8) -0.0004(7) -0.0002(7)
C7 0.0301(11) 0.0322(11) 0.0356(12) -0.0044(9) 0.0048(9) 0.0064(9)
C8 0.0239(9) 0.0233(10) 0.0302(11) 0.0029(8) -0.0004(8) 0.0014(8)
C9 0.0227(9) 0.0251(10) 0.0249(9) 0.0040(8) -0.0020(7) -0.0017(8)
C12 0.0189(13) 0.0211(13) 0.0288(15) 0.000 0.0000(11) 0.000
C11 0.0227(14) 0.0478(19) 0.0332(17) 0.000 -0.0068(12) 0.000
C13 0.0181(13) 0.0261(14) 0.0373(16) 0.000 0.0026(11) 0.000
C14 0.0227(14) 0.0187(12) 0.0314(15) 0.000 0.0062(11) 0.000
C15 0.0292(16) 0.0329(16) 0.0346(17) 0.000 0.0127(12) 0.000

_geom_special_details            
; 
 All esds (except the esd in the dihedral angle between two l.s. planes) 
 are estimated using the full covariance matrix.  The cell esds are taken 
 into account individually in the estimation of esds in distances, angles 
 and torsion angles; correlations between esds in cell parameters are only 
 used when they are defined by crystal symmetry.  An approximate (isotropic) 
 treatment of cell esds is used for estimating esds involving l.s. planes. 
;

loop_
_geom_bond_atom_site_label_1
_geom_bond_atom_site_label_2
_geom_bond_distance
_geom_bond_site_symmetry_2
_geom_bond_publ_flag
Cu N4 2.039(2) . ?
Cu N3 2.1250(17) 4_565 ?
Cu N3 2.1250(17) . ?
Cu S 2.2186(9) . ?
S C1 1.708(3) . ?
N1 C1 1.355(2) . ?
N1 C3 1.380(3) . ?
N1 C2 1.456(3) . ?
N3 C6 1.332(3) . ?
N3 N6 1.374(2) . ?
N6 C9 1.359(3) . ?
N6 B 1.550(2) . ?
N4 C12 1.337(4) . ?
N4 N5 1.377(3) . ?
N5 C14 1.354(4) . ?
N5 B 1.547(4) . ?
B N6 1.550(2) 4_565 ?
B H0 0.9800 . ?
C1 N1 1.355(2) 4_565 ?
C2 H2A 0.9600 . ?
C2 H2B 0.9600 . ?
C2 H2C 0.9600 . ?
C3 C3 1.347(5) 4_565 ?
C3 H3 0.9300 . ?
C6 C8 1.406(3) . ?
C6 C7 1.493(3) . ?
C7 H7A 0.9600 . ?
C7 H7B 0.9600 . ?
C7 H7C 0.9600 . ?
C8 C9 1.377(3) . ?
C8 H8A 0.9300 . ?
C9 C10 1.489(3) . ?
C10 H10A 0.9600 . ?
C10 H10B 0.9600 . ?
C10 H10C 0.9600 . ?
C12 C13 1.396(4) . ?
C12 C11 1.492(4) . ?
C11 H11A 0.9600 . ?
C11 H11B 0.9600 . ?
C11 H11C 0.9600 . ?
C13 C14 1.382(4) . ?
C13 H13A 0.9300 . ?
C14 C15 1.486(4) . ?
C15 H15A 0.9600 . ?
C15 H15B 0.9600 . ?
C15 H15C 0.9600 . ?

loop_
_geom_angle_atom_site_label_1
_geom_angle_atom_site_label_2
_geom_angle_atom_site_label_3
_geom_angle
_geom_angle_site_symmetry_1
_geom_angle_site_symmetry_3
_geom_angle_publ_flag
N4 Cu N3 92.09(7) . 4_565 ?
N4 Cu N3 92.09(7) . . ?
N3 Cu N3 87.24(9) 4_565 . ?
N4 Cu S 134.84(7) . . ?
N3 Cu S 119.14(5) 4_565 . ?
N3 Cu S 119.14(5) . . ?
C1 S Cu 105.62(10) . . ?
C1 N1 C3 109.89(19) . . ?
C1 N1 C2 125.23(19) . . ?
C3 N1 C2 124.8(2) . . ?
C6 N3 N6 106.77(16) . . ?
C6 N3 Cu 138.58(14) . . ?
N6 N3 Cu 113.97(12) . . ?
C9 N6 N3 110.00(16) . . ?
C9 N6 B 129.44(19) . . ?
N3 N6 B 119.65(17) . . ?
C12 N4 N5 106.6(2) . . ?
C12 N4 Cu 139.1(2) . . ?
N5 N4 Cu 114.34(17) . . ?
C14 N5 N4 109.8(2) . . ?
C14 N5 B 129.1(2) . . ?
N4 N5 B 121.1(2) . . ?
N5 B N6 110.49(15) . 4_565 ?
N5 B N6 110.49(15) . . ?
N6 B N6 107.8(2) 4_565 . ?
N5 B H0 109.3 . . ?
N6 B H0 109.3 4_565 . ?
N6 B H0 109.3 . . ?
N1 C1 N1 105.9(2) . 4_565 ?
N1 C1 S 127.06(12) . . ?
N1 C1 S 127.06(12) 4_565 . ?
N1 C2 H2A 109.5 . . ?
N1 C2 H2B 109.5 . . ?
H2A C2 H2B 109.5 . . ?
N1 C2 H2C 109.5 . . ?
H2A C2 H2C 109.5 . . ?
H2B C2 H2C 109.5 . . ?
C3 C3 N1 107.18(13) 4_565 . ?
C3 C3 H3 126.4 4_565 . ?
N1 C3 H3 126.4 . . ?
N3 C6 C8 109.80(18) . . ?
N3 C6 C7 120.75(19) . . ?
C8 C6 C7 129.45(19) . . ?
C6 C7 H7A 109.5 . . ?
C6 C7 H7B 109.5 . . ?
H7A C7 H7B 109.5 . . ?
C6 C7 H7C 109.5 . . ?
H7A C7 H7C 109.5 . . ?
H7B C7 H7C 109.5 . . ?
C9 C8 C6 106.04(18) . . ?
C9 C8 H8A 127.0 . . ?
C6 C8 H8A 127.0 . . ?
N6 C9 C8 107.38(18) . . ?
N6 C9 C10 123.02(19) . . ?
C8 C9 C10 129.6(2) . . ?
C9 C10 H10A 109.5 . . ?
C9 C10 H10B 109.5 . . ?
H10A C10 H10B 109.5 . . ?
C9 C10 H10C 109.5 . . ?
H10A C10 H10C 109.5 . . ?
H10B C10 H10C 109.5 . . ?
N4 C12 C13 110.1(3) . . ?
N4 C12 C11 120.6(3) . . ?
C13 C12 C11 129.3(3) . . ?
C12 C11 H11A 109.5 . . ?
C12 C11 H11B 109.5 . . ?
H11A C11 H11B 109.5 . . ?
C12 C11 H11C 109.5 . . ?
H11A C11 H11C 109.5 . . ?
H11B C11 H11C 109.5 . . ?
C14 C13 C12 105.9(3) . . ?
C14 C13 H13A 127.1 . . ?
C12 C13 H13A 127.1 . . ?
N5 C14 C13 107.7(3) . . ?
N5 C14 C15 123.7(3) . . ?
C13 C14 C15 128.7(3) . . ?
C14 C15 H15A 109.5 . . ?
C14 C15 H15B 109.5 . . ?
H15A C15 H15B 109.5 . . ?
C14 C15 H15C 109.5 . . ?
H15A C15 H15C 109.5 . . ?
H15B C15 H15C 109.5 . . ?

_diffrn_measured_fraction_theta_max 0.989
_diffrn_reflns_theta_full        26.74
_diffrn_measured_fraction_theta_full 0.989
_refine_diff_density_max         0.592
_refine_diff_density_min         -0.615
_refine_diff_density_rms         0.075

#==========================================================================================
#==========================================================================================

#      END OF CIF

#==========================================================================================
#==========================================================================================
 
data_Tp*Cu(dmise)

#==========================================================================================
_publ_section_references         
;
ENTER OTHER REFERENCES

Jacobson, R. (1998). <i>REQAB</i>. Version 1.1. Molecular Structure
Corporation, The Woodlands, Texas, USA.

Molecular Structure Corporation & Rigaku (2006). <i>CrystalClear</i> MSC, The
Woodlands, Texas, USA, and Rigaku Corporation, Tokyo, Japan.

Sheldrick, G. M. (2008). <i>SHELXTL</i>.Version 6.10 Acta Cryst. A64, 112-122.
;
_publ_section_exptl_refinement   
;
ENTER SPECIAL DETAILS OF THE REFINEMENT
;
_audit_creation_method           SHELXL-97
_chemical_name_systematic        ?
_chemical_name_common            ?
_chemical_formula_moiety         'C20 H30 B Cu N8 Se'
_chemical_formula_sum            'C20 H30 B Cu N8 Se'
_chemical_properties_physical    'air-sensitive, moisture-sensitive'
_exptl_crystal_recrystallization_method 'ether into methanol/dichloromethane '
_chemical_melting_point          ?

_exptl_crystal_description       prism
_exptl_crystal_colour            colorless

_diffrn_ambient_temperature      168.15
_chemical_formula_weight         535.83

loop_
_atom_type_symbol
_atom_type_description
_atom_type_scat_dispersion_real
_atom_type_scat_dispersion_imag
_atom_type_scat_source
C C 0.0033 0.0016 'International Tables Vol C Tables 4.2.6.8 and 6.1.1.4'
H H 0.0000 0.0000 'International Tables Vol C Tables 4.2.6.8 and 6.1.1.4'
B B 0.0013 0.0007 'International Tables Vol C Tables 4.2.6.8 and 6.1.1.4'
N N 0.0061 0.0033 'International Tables Vol C Tables 4.2.6.8 and 6.1.1.4'
Cu Cu 0.3201 1.2651 'International Tables Vol C Tables 4.2.6.8 and 6.1.1.4'
Se Se -0.0929 2.2259 'International Tables Vol C Tables 4.2.6.8 and 6.1.1.4'

_symmetry_cell_setting           monoclinic
_symmetry_space_group_name_H-M   'P 21/m'
_symmetry_int_tables_number      11
_chemical_absolute_configuration ?
_symmetry_space_group_name_Hall  '-P 2yb'
loop_
_symmetry_equiv_pos_as_xyz
'x, y, z'
'-x, y+1/2, -z'
'-x, -y, -z'
'x, -y-1/2, z'

_cell_length_a                   8.3319(17)
_cell_length_b                   11.771(2)
_cell_length_c                   12.082(2)
_cell_angle_alpha                90.00
_cell_angle_beta                 92.09(3)
_cell_angle_gamma                90.00
_cell_volume                     1184.2(4)
_cell_formula_units_Z            2
_cell_measurement_temperature    168.15
_cell_measurement_reflns_used    9538
_cell_measurement_theta_min      3.02
_cell_measurement_theta_max      26.29
_exptl_crystal_size_max          0.36
_exptl_crystal_size_mid          0.28
_exptl_crystal_size_min          0.22
_exptl_crystal_density_meas      ?
_exptl_crystal_density_diffrn    1.503
_exptl_crystal_density_method    'not measured'
_exptl_crystal_F_000             548
_exptl_absorpt_coefficient_mu    2.483
_exptl_absorpt_correction_type   'multi-scan'
_exptl_absorpt_correction_T_min  0.4684
_exptl_absorpt_correction_T_max  0.6111
_exptl_absorpt_process_details   'REQAB, CrystalClear'

_exptl_special_details           
; 
 ? 
;
_diffrn_radiation_probe          x-ray
_diffrn_radiation_type           MoK\a
_diffrn_radiation_wavelength     0.71073
_diffrn_source                   'fine-focus sealed tube'
_diffrn_radiation_monochromator  graphite
_diffrn_measurement_device_type  'Rigaku, AFC8S diffractometer'
_diffrn_measurement_method       dtprofit.ref
_diffrn_detector_area_resol_mean 14.6306
_diffrn_standards_number         0
_diffrn_standards_interval_count 0
_diffrn_standards_interval_time  0
_diffrn_standards_decay_%        0
_diffrn_reflns_number            9538
_diffrn_reflns_av_R_equivalents  0.0309
_diffrn_reflns_av_sigmaI/netI    0.0265
_diffrn_reflns_limit_h_min       -9
_diffrn_reflns_limit_h_max       10
_diffrn_reflns_limit_k_min       -14
_diffrn_reflns_limit_k_max       14
_diffrn_reflns_limit_l_min       -15
_diffrn_reflns_limit_l_max       11
_diffrn_reflns_theta_min         3.02
_diffrn_reflns_theta_max         26.29
_reflns_number_total             2494
_reflns_number_gt                2136
_reflns_threshold_expression     >2sigma(I)

_computing_data_collection       'CrystalClear (Rigaku/MSC,2006)'
_computing_cell_refinement       'CrystalClear (Rigaku/MSC,2006)'
_computing_data_reduction        'CrystalClear (Rigaku/MSC,2006)'
_computing_structure_solution    'SHELXTL 6.10 (Sheldrick,2008)'
_computing_structure_refinement  'SHELXTL 6.10 (Sheldrick,2008)'
_computing_molecular_graphics    'SHELXTL 6.10 (Sheldrick,2008)'
_computing_publication_material  'SHELXTL 6.10 (Sheldrick,2008)'

_refine_special_details          
; 
 Refinement of F^2^ against ALL reflections.  The weighted R-factor wR and 
 goodness of fit S are based on F^2^, conventional R-factors R are based 
 on F, with F set to zero for negative F^2^. The threshold expression of 
 F^2^ > 2sigma(F^2^) is used only for calculating R-factors(gt) etc. and is 
 not relevant to the choice of reflections for refinement.  R-factors based 
 on F^2^ are statistically about twice as large as those based on F, and R- 
 factors based on ALL data will be even larger. 
;

_refine_ls_structure_factor_coef Fsqd
_refine_ls_matrix_type           full
_refine_ls_weighting_scheme      calc
_refine_ls_weighting_details     
'calc w=1/[\s^2^(Fo^2^)+(0.0537P)^2^+1.3941P] where P=(Fo^2^+2Fc^2^)/3'
_atom_sites_solution_primary     direct
_atom_sites_solution_secondary   difmap
_atom_sites_solution_hydrogens   geom
_refine_ls_hydrogen_treatment    constr
_refine_ls_extinction_method     none
_refine_ls_extinction_coef       ?
_refine_ls_number_reflns         2494
_refine_ls_number_parameters     160
_refine_ls_number_restraints     0
_refine_ls_R_factor_all          0.0465
_refine_ls_R_factor_gt           0.0383
_refine_ls_wR_factor_ref         0.1021
_refine_ls_wR_factor_gt          0.0953
_refine_ls_goodness_of_fit_ref   1.059
_refine_ls_restrained_S_all      1.059
_refine_ls_shift/su_max          0.000
_refine_ls_shift/su_mean         0.000

loop_
_atom_site_label
_atom_site_type_symbol
_atom_site_fract_x
_atom_site_fract_y
_atom_site_fract_z
_atom_site_U_iso_or_equiv
_atom_site_adp_type
_atom_site_occupancy
_atom_site_symmetry_multiplicity
_atom_site_calc_flag
_atom_site_refinement_flags
_atom_site_disorder_assembly
_atom_site_disorder_group
Cu1 Cu 0.32586(6) 0.2500 0.36031(4) 0.02444(16) Uani 1 2 d S . .
Se1 Se 0.20396(5) 0.2500 0.53083(4) 0.03067(15) Uani 1 2 d S . .
N1 N 0.4503(3) 0.1584(2) 0.6791(2) 0.0279(5) Uani 1 1 d . . .
N2 N 0.5562(4) 0.2500 0.3102(3) 0.0236(7) Uani 1 2 d S . .
N3 N 0.2563(3) 0.1254(2) 0.2412(2) 0.0240(5) Uani 1 1 d . . .
N4 N 0.3156(3) 0.1437(2) 0.1380(2) 0.0241(5) Uani 1 1 d . . .
N5 N 0.5712(4) 0.2500 0.1972(3) 0.0231(7) Uani 1 2 d S . .
C1 C 0.3768(5) 0.2500 0.6332(3) 0.0239(8) Uani 1 2 d S . .
C2 C 0.4138(4) 0.0399(3) 0.6525(3) 0.0390(8) Uani 1 1 d . . .
H2A H 0.3606 0.0357 0.5807 0.059 Uiso 1 1 calc R . .
H2B H 0.3450 0.0092 0.7071 0.059 Uiso 1 1 calc R . .
H2C H 0.5117 -0.0031 0.6521 0.059 Uiso 1 1 calc R . .
C3 C 0.5711(4) 0.1932(3) 0.7531(3) 0.0336(7) Uani 1 1 d . . .
H3A H 0.6395 0.1463 0.7951 0.040 Uiso 1 1 calc R . .
C4 C 0.7340(6) 0.2500 0.4773(4) 0.0370(11) Uani 1 2 d S . .
H4A H 0.6321 0.2500 0.5120 0.055 Uiso 1 2 calc SR . .
H4B H 0.7934 0.3166 0.4995 0.055 Uiso 0.50 1 calc PR . .
H4C H 0.7934 0.1834 0.4995 0.055 Uiso 0.50 1 calc PR . .
C5 C 0.7074(5) 0.2500 0.3541(4) 0.0263(9) Uani 1 2 d S . .
C6 C 0.8172(5) 0.2500 0.2720(4) 0.0300(9) Uani 1 2 d S . .
H6A H 0.9285 0.2500 0.2811 0.036 Uiso 1 2 calc SR . .
C7 C 0.7283(5) 0.2500 0.1727(4) 0.0255(8) Uani 1 2 d S . .
C8 C 0.7863(6) 0.2500 0.0569(4) 0.0349(10) Uani 1 2 d S . .
H8A H 0.6958 0.2500 0.0054 0.052 Uiso 1 2 calc SR . .
H8B H 0.8501 0.1834 0.0455 0.052 Uiso 0.50 1 calc PR . .
H8C H 0.8501 0.3166 0.0455 0.052 Uiso 0.50 1 calc PR . .
C9 C 0.0655(4) -0.0041(3) 0.3276(3) 0.0343(7) Uani 1 1 d . . .
H9A H 0.1179 0.0227 0.3948 0.051 Uiso 1 1 calc R . .
H9B H 0.0662 -0.0856 0.3269 0.051 Uiso 1 1 calc R . .
H9C H -0.0434 0.0226 0.3238 0.051 Uiso 1 1 calc R . .
C10 C 0.1519(3) 0.0394(2) 0.2309(2) 0.0242(6) Uani 1 1 d . . .
C11 C 0.1429(4) 0.0024(3) 0.1203(3) 0.0290(6) Uani 1 1 d . . .
H11A H 0.0789 -0.0558 0.0911 0.035 Uiso 1 1 calc R . .
C12 C 0.2482(3) 0.0697(3) 0.0636(2) 0.0246(6) Uani 1 1 d . . .
C13 C 0.2874(4) 0.0691(3) -0.0557(3) 0.0341(7) Uani 1 1 d . . .
H13A H 0.3995 0.0527 -0.0626 0.051 Uiso 1 1 calc R . .
H13B H 0.2637 0.1422 -0.0875 0.051 Uiso 1 1 calc R . .
H13C H 0.2244 0.0121 -0.0939 0.051 Uiso 1 1 calc R . .
B1 B 0.4220(6) 0.2500 0.1178(4) 0.0261(10) Uani 1 2 d S . .
H1 H 0.4560 0.2500 0.0410 0.031 Uiso 1 2 calc SR . .

loop_
_atom_site_aniso_label
_atom_site_aniso_U_11
_atom_site_aniso_U_22
_atom_site_aniso_U_33
_atom_site_aniso_U_23
_atom_site_aniso_U_13
_atom_site_aniso_U_12
Cu1 0.0217(3) 0.0302(3) 0.0215(3) 0.000 0.00189(19) 0.000
Se1 0.0222(2) 0.0464(3) 0.0234(2) 0.000 0.00103(16) 0.000
N1 0.0251(13) 0.0298(13) 0.0287(13) 0.0009(10) 0.0009(10) 0.0012(10)
N2 0.0216(17) 0.0271(17) 0.0221(17) 0.000 0.0021(13) 0.000
N3 0.0225(12) 0.0267(12) 0.0232(12) -0.0012(9) 0.0032(9) -0.0026(10)
N4 0.0259(12) 0.0259(12) 0.0204(11) 0.0002(9) 0.0016(9) -0.0003(10)
N5 0.0214(17) 0.0253(17) 0.0230(17) 0.000 0.0036(13) 0.000
C1 0.0208(19) 0.032(2) 0.0195(19) 0.000 0.0033(15) 0.000
C2 0.042(2) 0.0300(16) 0.045(2) -0.0014(15) 0.0032(15) 0.0012(14)
C3 0.0247(15) 0.0471(18) 0.0288(16) 0.0068(14) -0.0033(12) 0.0035(13)
C4 0.026(2) 0.050(3) 0.034(2) 0.000 -0.0064(18) 0.000
C5 0.020(2) 0.028(2) 0.030(2) 0.000 -0.0015(16) 0.000
C6 0.022(2) 0.029(2) 0.039(2) 0.000 0.0006(18) 0.000
C7 0.025(2) 0.0203(18) 0.031(2) 0.000 0.0058(17) 0.000
C8 0.033(2) 0.035(2) 0.038(3) 0.000 0.0140(19) 0.000
C9 0.0341(17) 0.0345(16) 0.0346(17) 0.0040(13) 0.0069(13) -0.0081(14)
C10 0.0216(14) 0.0230(13) 0.0280(15) 0.0011(11) 0.0004(11) -0.0001(11)
C11 0.0270(15) 0.0285(15) 0.0311(16) -0.0038(12) -0.0025(12) -0.0018(12)
C12 0.0238(14) 0.0258(14) 0.0241(14) -0.0019(11) -0.0017(11) 0.0006(11)
C13 0.0385(18) 0.0377(18) 0.0262(16) -0.0047(13) 0.0013(13) -0.0043(14)
B1 0.028(2) 0.028(2) 0.023(2) 0.000 0.0050(18) 0.000

_geom_special_details            
; 
 All esds (except the esd in the dihedral angle between two l.s. planes) 
 are estimated using the full covariance matrix.  The cell esds are taken 
 into account individually in the estimation of esds in distances, angles 
 and torsion angles; correlations between esds in cell parameters are only 
 used when they are defined by crystal symmetry.  An approximate (isotropic) 
 treatment of cell esds is used for estimating esds involving l.s. planes. 
;

loop_
_geom_bond_atom_site_label_1
_geom_bond_atom_site_label_2
_geom_bond_distance
_geom_bond_site_symmetry_2
_geom_bond_publ_flag
Cu1 N2 2.033(4) . ?
Cu1 N3 2.120(2) . ?
Cu1 N3 2.120(2) 4_565 ?
Cu1 Se1 2.3299(9) . ?
Se1 C1 1.864(4) . ?
N1 C1 1.349(3) . ?
N1 C3 1.384(4) . ?
N1 C2 1.462(4) . ?
N2 C5 1.349(5) . ?
N2 N5 1.376(5) . ?
N3 C10 1.338(4) . ?
N3 N4 1.376(3) . ?
N4 C12 1.359(4) . ?
N4 B1 1.557(4) . ?
N5 C7 1.352(5) . ?
N5 B1 1.542(6) . ?
C1 N1 1.349(3) 4_565 ?
C2 H2A 0.9600 . ?
C2 H2B 0.9600 . ?
C2 H2C 0.9600 . ?
C3 C3 1.337(7) 4_565 ?
C3 H3A 0.9300 . ?
C4 C5 1.496(6) . ?
C4 H4A 0.9600 . ?
C4 H4B 0.9600 . ?
C4 H4C 0.9600 . ?
C5 C6 1.374(6) . ?
C6 C7 1.387(6) . ?
C6 H6A 0.9300 . ?
C7 C8 1.497(6) . ?
C8 H8A 0.9600 . ?
C8 H8B 0.9600 . ?
C8 H8C 0.9600 . ?
C9 C10 1.486(4) . ?
C9 H9A 0.9600 . ?
C9 H9B 0.9600 . ?
C9 H9C 0.9600 . ?
C10 C11 1.405(4) . ?
C11 C12 1.383(4) . ?
C11 H11A 0.9300 . ?
C12 C13 1.489(4) . ?
C13 H13A 0.9600 . ?
C13 H13B 0.9600 . ?
C13 H13C 0.9600 . ?
B1 N4 1.557(4) 4_565 ?
B1 H1 0.9800 . ?

loop_
_geom_angle_atom_site_label_1
_geom_angle_atom_site_label_2
_geom_angle_atom_site_label_3
_geom_angle
_geom_angle_site_symmetry_1
_geom_angle_site_symmetry_3
_geom_angle_publ_flag
N2 Cu1 N3 92.05(10) . . ?
N2 Cu1 N3 92.05(10) . 4_565 ?
N3 Cu1 N3 87.53(13) . 4_565 ?
N2 Cu1 Se1 135.23(10) . . ?
N3 Cu1 Se1 118.86(7) . . ?
N3 Cu1 Se1 118.86(7) 4_565 . ?
C1 Se1 Cu1 103.63(13) . . ?
C1 N1 C3 109.7(3) . . ?
C1 N1 C2 125.8(3) . . ?
C3 N1 C2 124.4(3) . . ?
C5 N2 N5 105.9(3) . . ?
C5 N2 Cu1 139.5(3) . . ?
N5 N2 Cu1 114.6(2) . . ?
C10 N3 N4 106.7(2) . . ?
C10 N3 Cu1 138.4(2) . . ?
N4 N3 Cu1 114.10(17) . . ?
C12 N4 N3 110.2(2) . . ?
C12 N4 B1 129.4(3) . . ?
N3 N4 B1 119.6(3) . . ?
C7 N5 N2 109.9(3) . . ?
C7 N5 B1 128.9(4) . . ?
N2 N5 B1 121.1(3) . . ?
N1 C1 N1 106.1(3) 4_565 . ?
N1 C1 Se1 126.92(17) 4_565 . ?
N1 C1 Se1 126.92(18) . . ?
N1 C2 H2A 109.5 . . ?
N1 C2 H2B 109.5 . . ?
H2A C2 H2B 109.5 . . ?
N1 C2 H2C 109.5 . . ?
H2A C2 H2C 109.5 . . ?
H2B C2 H2C 109.5 . . ?
C3 C3 N1 107.21(18) 4_565 . ?
C3 C3 H3A 126.4 4_565 . ?
N1 C3 H3A 126.4 . . ?
C5 C4 H4A 109.5 . . ?
C5 C4 H4B 109.5 . . ?
H4A C4 H4B 109.5 . . ?
C5 C4 H4C 109.5 . . ?
H4A C4 H4C 109.5 . . ?
H4B C4 H4C 109.5 . . ?
N2 C5 C6 110.6(4) . . ?
N2 C5 C4 119.6(4) . . ?
C6 C5 C4 129.8(4) . . ?
C5 C6 C7 106.0(4) . . ?
C5 C6 H6A 127.0 . . ?
C7 C6 H6A 127.0 . . ?
N5 C7 C6 107.5(4) . . ?
N5 C7 C8 123.6(4) . . ?
C6 C7 C8 128.9(4) . . ?
C7 C8 H8A 109.5 . . ?
C7 C8 H8B 109.5 . . ?
H8A C8 H8B 109.5 . . ?
C7 C8 H8C 109.5 . . ?
H8A C8 H8C 109.5 . . ?
H8B C8 H8C 109.5 . . ?
C10 C9 H9A 109.5 . . ?
C10 C9 H9B 109.5 . . ?
H9A C9 H9B 109.5 . . ?
C10 C9 H9C 109.5 . . ?
H9A C9 H9C 109.5 . . ?
H9B C9 H9C 109.5 . . ?
N3 C10 C11 109.6(3) . . ?
N3 C10 C9 121.3(3) . . ?
C11 C10 C9 129.1(3) . . ?
C12 C11 C10 106.3(3) . . ?
C12 C11 H11A 126.8 . . ?
C10 C11 H11A 126.8 . . ?
N4 C12 C11 107.1(3) . . ?
N4 C12 C13 122.9(3) . . ?
C11 C12 C13 130.0(3) . . ?
C12 C13 H13A 109.5 . . ?
C12 C13 H13B 109.5 . . ?
H13A C13 H13B 109.5 . . ?
C12 C13 H13C 109.5 . . ?
H13A C13 H13C 109.5 . . ?
H13B C13 H13C 109.5 . . ?
N5 B1 N4 110.7(2) . 4_565 ?
N5 B1 N4 110.7(2) . . ?
N4 B1 N4 106.8(3) 4_565 . ?
N5 B1 H1 109.5 . . ?
N4 B1 H1 109.5 4_565 . ?
N4 B1 H1 109.5 . . ?

_diffrn_measured_fraction_theta_max 0.990
_diffrn_reflns_theta_full        26.29
_diffrn_measured_fraction_theta_full 0.990
_refine_diff_density_max         0.712
_refine_diff_density_min         -0.513
_refine_diff_density_rms         0.089

#=========================================================================================

#     END OF CIF

#=========================================================================================
